# Supplementary material for: Whole Genomic Constellation of Avian Reovirus Strains Isolated from Broilers with Arthritis in North Carolina, USA
Source: MDPI journal article supplement (doi:10.3390/v15112191), 2023-10-31
Supplement: s1 [file s1]

**Table S1.** Long-read sequencing data generated for our NC strains.

| Strain R18-37308 |           |           |           |           |           |           |           |         |           |           |
|------------------|-----------|-----------|-----------|-----------|-----------|-----------|-----------|---------|-----------|-----------|
| Segment          | L1        | L2        | L3        | M1        | M2        | M3        | S1        | S2      | S3        | S4        |
| Mean read length | 1,870     | 1,421     | 1,574     | 1,188     | 1,052     | 1,171     | 964       | 961     | 817       | 860       |
| Mean read Phred  | 13        | 13        | 13        | 12        | 12        | 12        | 12        | 12      | 12        | 12        |
| Number of reads  | 1,751     | 1,420     | 1,934     | 1,070     | 1,944     | 1,174     | 1,052     | 847     | 1,353     | 1,396     |
| Read length N50  | 2,810     | 2,147     | 2,511     | 1,662     | 1,505     | 1,648     | 1,286     | 1,189   | 1,005     | 1,025     |
| Total bases      | 3,273,802 | 2,017,584 | 3,044,043 | 1,271,195 | 2,045,941 | 1,374,420 | 1,014,061 | 813,606 | 1,105,732 | 1,200,578 |
| Average depth    | 827       | 527       | 779       | 557       | 948       | 689       | 617       | 615     | 920       | 1,007     |

  

| Strain R18-38167 |           |           |           |         |           |           |           |           |           |         |
|------------------|-----------|-----------|-----------|---------|-----------|-----------|-----------|-----------|-----------|---------|
| Segment          | L1        | L2        | L3        | M1      | M2        | M3        | S1        | S2        | S3        | S4      |
| Mean read length | 1,665     | 1,509     | 1,385     | 1,230   | 1,088     | 1,142     | 1,182     | 919       | 814       | 842     |
| Mean read Phred  | 12        | 13        | 13        | 12      | 12        | 12        | 12        | 12        | 12        | 12      |
| Number of reads  | 2,011     | 882       | 1,526     | 577     | 1,410     | 1,451     | 1,172     | 1,511     | 1,540     | 1,089   |
| Read length N50  | 2,625     | 2,259     | 2,138     | 1,764   | 1,540     | 1,582     | 1,504     | 1,153     | 1,052     | 1,007   |
| Total bases      | 3,347,240 | 1,331,138 | 2,114,000 | 709,717 | 1,533,470 | 1,657,549 | 1,385,528 | 1,389,099 | 1,253,631 | 916,902 |
| Average depth    | 845       | 348       | 541       | 311     | 711       | 830       | 843       | 1,049     | 1,043     | 769     |

**Table S2.** Evolutionary divergence estimates between  $\sigma$ C sequences of ARV isolates.

| Species 1            | Species 2           | Dist       |
|----------------------|---------------------|------------|
| SD09-1/Ck/CHN/09     | C78/Ck/CHN/13       | 0.00002232 |
| C-98/Ck/CHN/06       | MS01/Ck/CHN/17      | 0.00002232 |
| 157/Wb/KOR/15        | 205/Wb/KOR/18       | 0.00002232 |
| 878-Bi-05/Ck/HUN/05  | 875-Bi-05/Ck/HUN/05 | 0.00002232 |
| V-ARV-SD26/Ck/CHN/20 | LY383/Ck/CHN/16     | 0.00002232 |
| MS01/Ck/CHN/17       | T-98/Ck/CHN/06      | 0.00003348 |
| C-98/Ck/CHN/06       | T-98/Ck/CHN/06      | 0.00003348 |
| 48/Wb/KOR/15         | 205/Wb/KOR/18       | 0.00004464 |
| 48/Wb/KOR/15         | 157/Wb/KOR/15       | 0.00004464 |
| GuangxiR1/Ck/CHN/00  | 1733/Ck/USA/97      | 0.00288176 |
| C78/Ck/CHN/13        | Avs-S1133/Ck/CHN/13 | 0.00288678 |
| SD09-1/Ck/CHN/09     | Avs-S1133/Ck/CHN/13 | 0.00288678 |
| 205/Wb/KOR/18        | 19/Wb/KOR/15        | 0.00288756 |
| 157/Wb/KOR/15        | 19/Wb/KOR/15        | 0.00288756 |
| 48/Wb/KOR/15         | 19/Wb/KOR/15        | 0.00288756 |
| C78/Ck/CHN/13        | YJL/Dk/CHN/05       | 0.00289838 |
| SD09-1/Ck/CHN/09     | YJL/Dk/CHN/05       | 0.00289838 |
| 205/Wb/KOR/18        | 19/Wb/KOR/18        | 0.00290353 |
| 157/Wb/KOR/15        | 19/Wb/KOR/18        | 0.00290353 |
| 48/Wb/KOR/15         | 19/Wb/KOR/18        | 0.00290353 |
| 108/Wb/KOR/15        | 205/Wb/KOR/18       | 0.00291016 |

|                     |                     |            |
|---------------------|---------------------|------------|
| 108/Wb/KOR/15       | 157/Wb/KOR/15       | 0.00291016 |
| 108/Wb/KOR/15       | 48/Wb/KOR/15        | 0.00291016 |
| C78/Ck/CHN/13       | YH/Dk/CHN/05        | 0.00291605 |
| SD09-1/Ck/CHN/09    | YH/Dk/CHN/05        | 0.00291605 |
| C78/Ck/CHN/13       | 13/Wb/KOR/18        | 0.00291801 |
| SD09-1/Ck/CHN/09    | 13/Wb/KOR/18        | 0.00291801 |
| C78/Ck/CHN/13       | SD10-1/Ck/CHN/09    | 0.00294328 |
| SD09-1/Ck/CHN/09    | SD10-1/Ck/CHN/09    | 0.00294328 |
| C78/Ck/CHN/13       | GX/2010/1/Ck/CHN/10 | 0.00294862 |
| SD09-1/Ck/CHN/09    | GX/2010/1/Ck/CHN/10 | 0.00294862 |
| 19/Wb/KOR/15        | 19/Wb/KOR/18        | 0.00572412 |
| 108/Wb/KOR/15       | 19/Wb/KOR/18        | 0.00572440 |
| 108/Wb/KOR/15       | 19/Wb/KOR/15        | 0.00573075 |
| GuangxiR1/Ck/CHN/00 | GuangxiR2/Ck/CHN/00 | 0.00573456 |
| SD10-1/Ck/CHN/09    | GX/2010/1/Ck/CHN/10 | 0.00573565 |
| Avs-S1133/Ck/CHN/13 | YJL/Dk/CHN/05       | 0.00574052 |
| YH/Dk/CHN/05        | 13/Wb/KOR/18        | 0.00574478 |
| YJL/Dk/CHN/05       | YH/Dk/CHN/05        | 0.00574747 |
| YJL/Dk/CHN/05       | 13/Wb/KOR/18        | 0.00574943 |
| SD10-1/Ck/CHN/09    | 13/Wb/KOR/18        | 0.00574968 |
| GX/2010/1/Ck/CHN/10 | 13/Wb/KOR/18        | 0.00575502 |
| Avs-S1133/Ck/CHN/13 | YH/Dk/CHN/05        | 0.00575819 |
| Avs-S1133/Ck/CHN/13 | 13/Wb/KOR/18        | 0.00576015 |
| SD10-1/Ck/CHN/09    | YH/Dk/CHN/05        | 0.00577005 |
| SD10-1/Ck/CHN/09    | YJL/Dk/CHN/05       | 0.00577470 |
| GX/2010/1/Ck/CHN/10 | YH/Dk/CHN/05        | 0.00577539 |
| GX/2010/1/Ck/CHN/10 | YJL/Dk/CHN/05       | 0.00578004 |
| SD10-1/Ck/CHN/09    | Avs-S1133/Ck/CHN/13 | 0.00578542 |
| 205/Wb/KOR/18       | 106/Wb/KOR/19       | 0.00578956 |
| 157/Wb/KOR/15       | 106/Wb/KOR/19       | 0.00578956 |
| 48/Wb/KOR/15        | 106/Wb/KOR/19       | 0.00578956 |
| Avs-S1133/Ck/CHN/13 | GX/2010/1/Ck/CHN/10 | 0.00579076 |
| 205/Wb/KOR/18       | T-98/Ck/CHN/06      | 0.00582166 |
| 157/Wb/KOR/15       | T-98/Ck/CHN/06      | 0.00582166 |
| 48/Wb/KOR/15        | T-98/Ck/CHN/06      | 0.00582166 |
| 205/Wb/KOR/18       | MS01/Ck/CHN/17      | 0.00583282 |
| 205/Wb/KOR/18       | C-98/Ck/CHN/06      | 0.00583282 |
| 157/Wb/KOR/15       | MS01/Ck/CHN/17      | 0.00583282 |
| 157/Wb/KOR/15       | C-98/Ck/CHN/06      | 0.00583282 |
| 48/Wb/KOR/15        | MS01/Ck/CHN/17      | 0.00583282 |
| 48/Wb/KOR/15        | C-98/Ck/CHN/06      | 0.00583282 |
| C78/Ck/CHN/13       | GX110116/Ck/CHN/11  | 0.00588046 |

|                     |                     |            |
|---------------------|---------------------|------------|
| SD09-1/Ck/CHN/09    | GX110116/Ck/CHN/11  | 0.00588046 |
| 01224B/Ck/USA/14    | D12/Ck/CAN/14       | 0.00602304 |
| 108/Wb/KOR/15       | 106/Wb/KOR/19       | 0.00858811 |
| 1733/Ck/USA/97      | GuangxiR2/Ck/CHN/00 | 0.00859399 |
| GuangxiR2/Ck/CHN/00 | 2408/Ck/USA/83      | 0.00859751 |
| 19/Wb/KOR/18        | 106/Wb/KOR/19       | 0.00860380 |
| T-98/Ck/CHN/06      | GuangxiR2/Ck/CHN/00 | 0.00860940 |
| 19/Wb/KOR/15        | 106/Wb/KOR/19       | 0.00861015 |
| 108/Wb/KOR/15       | T-98/Ck/CHN/06      | 0.00862021 |
| MS01/Ck/CHN/17      | GuangxiR2/Ck/CHN/00 | 0.00862056 |
| C-98/Ck/CHN/06      | GuangxiR2/Ck/CHN/00 | 0.00862056 |
| GuangxiR1/Ck/CHN/00 | 2408/Ck/USA/83      | 0.00862444 |
| 108/Wb/KOR/15       | MS01/Ck/CHN/17      | 0.00863137 |
| 108/Wb/KOR/15       | C-98/Ck/CHN/06      | 0.00863137 |
| 19/Wb/KOR/18        | T-98/Ck/CHN/06      | 0.00863590 |
| T-98/Ck/CHN/06      | GuangxiR1/Ck/CHN/00 | 0.00863632 |
| 19/Wb/KOR/15        | T-98/Ck/CHN/06      | 0.00864225 |
| 19/Wb/KOR/18        | MS01/Ck/CHN/17      | 0.00864706 |
| 19/Wb/KOR/18        | C-98/Ck/CHN/06      | 0.00864706 |
| MS01/Ck/CHN/17      | GuangxiR1/Ck/CHN/00 | 0.00864748 |
| C-98/Ck/CHN/06      | GuangxiR1/Ck/CHN/00 | 0.00864748 |
| S1133/Ck/CHN/14     | GX110058/Ck/CHN/11  | 0.00864781 |
| GX/2010/1/Ck/CHN/10 | GX110116/Ck/CHN/11  | 0.00865050 |
| 19/Wb/KOR/15        | MS01/Ck/CHN/17      | 0.00865341 |
| 19/Wb/KOR/15        | C-98/Ck/CHN/06      | 0.00865341 |
| 205/Wb/KOR/18       | GuangxiR2/Ck/CHN/00 | 0.00865593 |
| 157/Wb/KOR/15       | GuangxiR2/Ck/CHN/00 | 0.00865593 |
| 48/Wb/KOR/15        | GuangxiR2/Ck/CHN/00 | 0.00865593 |
| SD10-1/Ck/CHN/09    | GX110116/Ck/CHN/11  | 0.00866749 |
| 205/Wb/KOR/18       | GuangxiR1/Ck/CHN/00 | 0.00868286 |
| 157/Wb/KOR/15       | GuangxiR1/Ck/CHN/00 | 0.00868286 |
| 48/Wb/KOR/15        | GuangxiR1/Ck/CHN/00 | 0.00868286 |
| 13/Wb/KOR/18        | GX110116/Ck/CHN/11  | 0.00868686 |
| YH/Dk/CHN/05        | GX110116/Ck/CHN/11  | 0.00870722 |
| YJL/Dk/CHN/05       | GX110116/Ck/CHN/11  | 0.00871187 |
| Avs-S1133/Ck/CHN/13 | GX110116/Ck/CHN/11  | 0.00872259 |
| D12/Ck/CAN/14       | D6/Ck/CAN/14        | 0.00903275 |
| D8/Ck/CAN/14        | D12/Ck/CAN/14       | 0.00903700 |
| 108/Wb/KOR/15       | GuangxiR2/Ck/CHN/00 | 0.01145448 |
| T-98/Ck/CHN/06      | 106/Wb/KOR/19       | 0.01145496 |
| MS01/Ck/CHN/17      | 106/Wb/KOR/19       | 0.01146612 |
| C-98/Ck/CHN/06      | 106/Wb/KOR/19       | 0.01146612 |

|                |                     |            |
|----------------|---------------------|------------|
| 19/Wb/KOR/18   | GuangxiR2/Ck/CHN/00 | 0.01147018 |
| 19/Wb/KOR/15   | GuangxiR2/Ck/CHN/00 | 0.01147653 |
| T-98/Ck/CHN/06 | 2408/Ck/USA/83      | 0.01147696 |
| 108/Wb/KOR/15  | GuangxiR1/Ck/CHN/00 | 0.01148141 |
| 1733/Ck/USA/97 | 2408/Ck/USA/83      | 0.01148387 |
| MS01/Ck/CHN/17 | 2408/Ck/USA/83      | 0.01148812 |
| C-98/Ck/CHN/06 | 2408/Ck/USA/83      | 0.01148812 |
| T-98/Ck/CHN/06 | 1733/Ck/USA/97      | 0.01149576 |
| 19/Wb/KOR/18   | GuangxiR1/Ck/CHN/00 | 0.01149710 |
| 19/Wb/KOR/15   | GuangxiR1/Ck/CHN/00 | 0.01150345 |
| MS01/Ck/CHN/17 | 1733/Ck/USA/97      | 0.01150692 |
| C-98/Ck/CHN/06 | 1733/Ck/USA/97      | 0.01150692 |
| 205/Wb/KOR/18  | 2408/Ck/USA/83      | 0.01152349 |
| 157/Wb/KOR/15  | 2408/Ck/USA/83      | 0.01152349 |
| 48/Wb/KOR/15   | 2408/Ck/USA/83      | 0.01152349 |
| 205/Wb/KOR/18  | 1733/Ck/USA/97      | 0.01154229 |
| 157/Wb/KOR/15  | 1733/Ck/USA/97      | 0.01154229 |
| 48/Wb/KOR/15   | 1733/Ck/USA/97      | 0.01154229 |
| 205/Wb/KOR/18  | 113/Wb/KOR/15       | 0.01157353 |
| 157/Wb/KOR/15  | 113/Wb/KOR/15       | 0.01157353 |
| 48/Wb/KOR/15   | 113/Wb/KOR/15       | 0.01157353 |
| D1/Ck/CAN/14   | D3/Ck/CAN/14        | 0.01217911 |
| 106/Wb/KOR/19  | GuangxiR2/Ck/CHN/00 | 0.01428924 |
| 106/Wb/KOR/19  | GuangxiR1/Ck/CHN/00 | 0.01431616 |
| 108/Wb/KOR/15  | 2408/Ck/USA/83      | 0.01432204 |
| 19/Wb/KOR/18   | 2408/Ck/USA/83      | 0.01433774 |
| 108/Wb/KOR/15  | 1733/Ck/USA/97      | 0.01434084 |
| 19/Wb/KOR/15   | 2408/Ck/USA/83      | 0.01434409 |
| 19/Wb/KOR/18   | 1733/Ck/USA/97      | 0.01435654 |
| 19/Wb/KOR/15   | 1733/Ck/USA/97      | 0.01436289 |
| 108/Wb/KOR/15  | 113/Wb/KOR/15       | 0.01437208 |
| 19/Wb/KOR/18   | 113/Wb/KOR/15       | 0.01438778 |
| 19/Wb/KOR/15   | 113/Wb/KOR/15       | 0.01439413 |
| T-98/Ck/CHN/06 | C78/Ck/CHN/13       | 0.01457470 |
| T-98/Ck/CHN/06 | SD09-1/Ck/CHN/09    | 0.01457470 |
| MS01/Ck/CHN/17 | C78/Ck/CHN/13       | 0.01458586 |
| MS01/Ck/CHN/17 | SD09-1/Ck/CHN/09    | 0.01458586 |
| C-98/Ck/CHN/06 | C78/Ck/CHN/13       | 0.01458586 |
| C-98/Ck/CHN/06 | SD09-1/Ck/CHN/09    | 0.01458586 |
| 205/Wb/KOR/18  | C78/Ck/CHN/13       | 0.01464356 |
| 205/Wb/KOR/18  | SD09-1/Ck/CHN/09    | 0.01464356 |
| 157/Wb/KOR/15  | C78/Ck/CHN/13       | 0.01464356 |

|                      |                            |                   |
|----------------------|----------------------------|-------------------|
| 157/Wb/KOR/15        | SD09-1/Ck/CHN/09           | 0.01464356        |
| 48/Wb/KOR/15         | C78/Ck/CHN/13              | 0.01464356        |
| 48/Wb/KOR/15         | SD09-1/Ck/CHN/09           | 0.01464356        |
| D8/Ck/CAN/14         | 01224B/Ck/USA/14           | 0.01501539        |
| 01224B/Ck/USA/14     | D6/Ck/CAN/14               | 0.01503346        |
| <b>D12/Ck/CAN/14</b> | <b>R18-38167/Ck/USA/18</b> | <b>0.01509024</b> |
| 106/Wb/KOR/19        | 2408/Ck/USA/83             | 0.01715680        |
| 106/Wb/KOR/19        | 1733/Ck/USA/97             | 0.01717560        |
| T-98/Ck/CHN/06       | 71/Wb/KOR/15               | 0.01722464        |
| 106/Wb/KOR/19        | 113/Wb/KOR/15              | 0.01722916        |
| T-98/Ck/CHN/06       | S1133/Ck/CHN/14            | 0.01723175        |
| MS01/Ck/CHN/17       | 71/Wb/KOR/15               | 0.01723580        |
| C-98/Ck/CHN/06       | 71/Wb/KOR/15               | 0.01723580        |
| 71/Wb/KOR/15         | S1133/Ck/CHN/14            | 0.01724285        |
| MS01/Ck/CHN/17       | S1133/Ck/CHN/14            | 0.01724291        |
| C-98/Ck/CHN/06       | S1133/Ck/CHN/14            | 0.01724291        |
| T-98/Ck/CHN/06       | 113/Wb/KOR/15              | 0.01726126        |
| MS01/Ck/CHN/17       | 113/Wb/KOR/15              | 0.01727242        |
| C-98/Ck/CHN/06       | 113/Wb/KOR/15              | 0.01727242        |
| 205/Wb/KOR/18        | 71/Wb/KOR/15               | 0.01731582        |
| 157/Wb/KOR/15        | 71/Wb/KOR/15               | 0.01731582        |
| 48/Wb/KOR/15         | 71/Wb/KOR/15               | 0.01731582        |
| 205/Wb/KOR/18        | S1133/Ck/CHN/14            | 0.01732292        |
| 157/Wb/KOR/15        | S1133/Ck/CHN/14            | 0.01732292        |
| 48/Wb/KOR/15         | S1133/Ck/CHN/14            | 0.01732292        |
| T-98/Ck/CHN/06       | GX/2010/1/Ck/CHN/10        | 0.01734475        |
| MS01/Ck/CHN/17       | GX/2010/1/Ck/CHN/10        | 0.01735591        |
| C-98/Ck/CHN/06       | GX/2010/1/Ck/CHN/10        | 0.01735591        |
| T-98/Ck/CHN/06       | SD10-1/Ck/CHN/09           | 0.01736173        |
| MS01/Ck/CHN/17       | SD10-1/Ck/CHN/09           | 0.01737289        |
| C-98/Ck/CHN/06       | SD10-1/Ck/CHN/09           | 0.01737289        |
| T-98/Ck/CHN/06       | 13/Wb/KOR/18               | 0.01738110        |
| MS01/Ck/CHN/17       | 13/Wb/KOR/18               | 0.01739226        |
| C-98/Ck/CHN/06       | 13/Wb/KOR/18               | 0.01739226        |
| T-98/Ck/CHN/06       | YH/Dk/CHN/05               | 0.01740147        |
| T-98/Ck/CHN/06       | YJL/Dk/CHN/05              | 0.01740612        |
| MS01/Ck/CHN/17       | YH/Dk/CHN/05               | 0.01741263        |
| C-98/Ck/CHN/06       | YH/Dk/CHN/05               | 0.01741263        |
| 205/Wb/KOR/18        | GX/2010/1/Ck/CHN/10        | 0.01741360        |
| 157/Wb/KOR/15        | GX/2010/1/Ck/CHN/10        | 0.01741360        |
| 48/Wb/KOR/15         | GX/2010/1/Ck/CHN/10        | 0.01741360        |
| T-98/Ck/CHN/06       | Avs-S1133/Ck/CHN/13        | 0.01741684        |

|                     |                     |            |
|---------------------|---------------------|------------|
| MS01/Ck/CHN/17      | YJL/Dk/CHN/05       | 0.01741728 |
| C-98/Ck/CHN/06      | YJL/Dk/CHN/05       | 0.01741728 |
| MS01/Ck/CHN/17      | Avs-S1133/Ck/CHN/13 | 0.01742800 |
| C-98/Ck/CHN/06      | Avs-S1133/Ck/CHN/13 | 0.01742800 |
| 205/Wb/KOR/18       | SD10-1/Ck/CHN/09    | 0.01743059 |
| 157/Wb/KOR/15       | SD10-1/Ck/CHN/09    | 0.01743059 |
| 48/Wb/KOR/15        | SD10-1/Ck/CHN/09    | 0.01743059 |
| GuangxiR2/Ck/CHN/00 | C78/Ck/CHN/13       | 0.01743130 |
| GuangxiR2/Ck/CHN/00 | SD09-1/Ck/CHN/09    | 0.01743130 |
| 108/Wb/KOR/15       | C78/Ck/CHN/13       | 0.01744211 |
| 108/Wb/KOR/15       | SD09-1/Ck/CHN/09    | 0.01744211 |
| 205/Wb/KOR/18       | 13/Wb/KOR/18        | 0.01744996 |
| 157/Wb/KOR/15       | 13/Wb/KOR/18        | 0.01744996 |
| 48/Wb/KOR/15        | 13/Wb/KOR/18        | 0.01744996 |
| 19/Wb/KOR/18        | C78/Ck/CHN/13       | 0.01745780 |
| 19/Wb/KOR/18        | SD09-1/Ck/CHN/09    | 0.01745780 |
| GuangxiR1/Ck/CHN/00 | C78/Ck/CHN/13       | 0.01745822 |
| GuangxiR1/Ck/CHN/00 | SD09-1/Ck/CHN/09    | 0.01745822 |
| 19/Wb/KOR/15        | C78/Ck/CHN/13       | 0.01746415 |
| 19/Wb/KOR/15        | SD09-1/Ck/CHN/09    | 0.01746415 |
| 205/Wb/KOR/18       | YH/Dk/CHN/05        | 0.01747033 |
| 157/Wb/KOR/15       | YH/Dk/CHN/05        | 0.01747033 |
| 48/Wb/KOR/15        | YH/Dk/CHN/05        | 0.01747033 |
| 205/Wb/KOR/18       | YJL/Dk/CHN/05       | 0.01747497 |
| 157/Wb/KOR/15       | YJL/Dk/CHN/05       | 0.01747497 |
| 48/Wb/KOR/15        | YJL/Dk/CHN/05       | 0.01747497 |
| 205/Wb/KOR/18       | Avs-S1133/Ck/CHN/13 | 0.01748569 |
| 157/Wb/KOR/15       | Avs-S1133/Ck/CHN/13 | 0.01748569 |
| 48/Wb/KOR/15        | Avs-S1133/Ck/CHN/13 | 0.01748569 |
| D8/Ck/CAN/14        | D6/Ck/CAN/14        | 0.01804743 |
| NLI12-96M/Ck/NLD/01 | 17203-M/Ck/HUN/06   | 0.01869933 |
| 113/Wb/KOR/15       | GuangxiR2/Ck/CHN/00 | 0.02009554 |
| GuangxiR2/Ck/CHN/00 | 71/Wb/KOR/15        | 0.02010356 |
| GuangxiR2/Ck/CHN/00 | S1133/Ck/CHN/14     | 0.02011067 |
| 108/Wb/KOR/15       | 71/Wb/KOR/15        | 0.02011437 |
| 108/Wb/KOR/15       | S1133/Ck/CHN/14     | 0.02012147 |
| 113/Wb/KOR/15       | GuangxiR1/Ck/CHN/00 | 0.02012246 |
| 19/Wb/KOR/18        | 71/Wb/KOR/15        | 0.02013006 |
| GuangxiR1/Ck/CHN/00 | 71/Wb/KOR/15        | 0.02013049 |
| T-98/Ck/CHN/06      | GX110058/Ck/CHN/11  | 0.02013182 |
| 19/Wb/KOR/15        | 71/Wb/KOR/15        | 0.02013641 |
| 19/Wb/KOR/18        | S1133/Ck/CHN/14     | 0.02013717 |

|                     |                     |            |
|---------------------|---------------------|------------|
| GuangxiR1/Ck/CHN/00 | S1133/Ck/CHN/14     | 0.02013759 |
| 71/Wb/KOR/15        | GX110058/Ck/CHN/11  | 0.02014293 |
| MS01/Ck/CHN/17      | GX110058/Ck/CHN/11  | 0.02014298 |
| C-98/Ck/CHN/06      | GX110058/Ck/CHN/11  | 0.02014298 |
| 19/Wb/KOR/15        | S1133/Ck/CHN/14     | 0.02014352 |
| GuangxiR2/Ck/CHN/00 | GX/2010/1/Ck/CHN/10 | 0.02020135 |
| 108/Wb/KOR/15       | GX/2010/1/Ck/CHN/10 | 0.02021215 |
| GuangxiR2/Ck/CHN/00 | SD10-1/Ck/CHN/09    | 0.02021833 |
| 205/Wb/KOR/18       | GX110058/Ck/CHN/11  | 0.02022300 |
| 157/Wb/KOR/15       | GX110058/Ck/CHN/11  | 0.02022300 |
| 48/Wb/KOR/15        | GX110058/Ck/CHN/11  | 0.02022300 |
| 19/Wb/KOR/18        | GX/2010/1/Ck/CHN/10 | 0.02022785 |
| GuangxiR1/Ck/CHN/00 | GX/2010/1/Ck/CHN/10 | 0.02022827 |
| 108/Wb/KOR/15       | SD10-1/Ck/CHN/09    | 0.02022914 |
| 19/Wb/KOR/15        | GX/2010/1/Ck/CHN/10 | 0.02023419 |
| GuangxiR2/Ck/CHN/00 | 13/Wb/KOR/18        | 0.02023770 |
| 19/Wb/KOR/18        | SD10-1/Ck/CHN/09    | 0.02024483 |
| GuangxiR1/Ck/CHN/00 | SD10-1/Ck/CHN/09    | 0.02024525 |
| 108/Wb/KOR/15       | 13/Wb/KOR/18        | 0.02024851 |
| 19/Wb/KOR/15        | SD10-1/Ck/CHN/09    | 0.02025118 |
| T-98/Ck/CHN/06      | GX110116/Ck/CHN/11  | 0.02025426 |
| GuangxiR2/Ck/CHN/00 | YH/Dk/CHN/05        | 0.02025807 |
| GuangxiR2/Ck/CHN/00 | YJL/Dk/CHN/05       | 0.02026272 |
| 19/Wb/KOR/18        | 13/Wb/KOR/18        | 0.02026420 |
| GuangxiR1/Ck/CHN/00 | 13/Wb/KOR/18        | 0.02026462 |
| MS01/Ck/CHN/17      | GX110116/Ck/CHN/11  | 0.02026542 |
| C-98/Ck/CHN/06      | GX110116/Ck/CHN/11  | 0.02026542 |
| 108/Wb/KOR/15       | YH/Dk/CHN/05        | 0.02026888 |
| 19/Wb/KOR/15        | 13/Wb/KOR/18        | 0.02027055 |
| GuangxiR2/Ck/CHN/00 | Avs-S1133/Ck/CHN/13 | 0.02027344 |
| 108/Wb/KOR/15       | YJL/Dk/CHN/05       | 0.02027352 |
| 106/Wb/KOR/19       | C78/Ck/CHN/13       | 0.02027686 |
| 106/Wb/KOR/19       | SD09-1/Ck/CHN/09    | 0.02027686 |
| 108/Wb/KOR/15       | Avs-S1133/Ck/CHN/13 | 0.02028424 |
| 19/Wb/KOR/18        | YH/Dk/CHN/05        | 0.02028457 |
| GuangxiR1/Ck/CHN/00 | YH/Dk/CHN/05        | 0.02028499 |
| 19/Wb/KOR/18        | YJL/Dk/CHN/05       | 0.02028922 |
| GuangxiR1/Ck/CHN/00 | YJL/Dk/CHN/05       | 0.02028964 |
| 19/Wb/KOR/15        | YH/Dk/CHN/05        | 0.02029092 |
| 19/Wb/KOR/15        | YJL/Dk/CHN/05       | 0.02029557 |
| 2408/Ck/USA/83      | C78/Ck/CHN/13       | 0.02029886 |
| 2408/Ck/USA/83      | SD09-1/Ck/CHN/09    | 0.02029886 |

|                     |                     |            |
|---------------------|---------------------|------------|
| 19/Wb/KOR/18        | Avs-S1133/Ck/CHN/13 | 0.02029994 |
| GuangxiR1/Ck/CHN/00 | Avs-S1133/Ck/CHN/13 | 0.02030036 |
| 19/Wb/KOR/15        | Avs-S1133/Ck/CHN/13 | 0.02030629 |
| 1733/Ck/USA/97      | C78/Ck/CHN/13       | 0.02031766 |
| 1733/Ck/USA/97      | SD09-1/Ck/CHN/09    | 0.02031766 |
| 205/Wb/KOR/18       | GX110116/Ck/CHN/11  | 0.02032312 |
| 157/Wb/KOR/15       | GX110116/Ck/CHN/11  | 0.02032312 |
| 48/Wb/KOR/15        | GX110116/Ck/CHN/11  | 0.02032312 |
| 01224B/Ck/USA/14    | R18-38167/Ck/USA/18 | 0.02104631 |
| D1/Ck/CAN/14        | D12/Ck/CAN/14       | 0.02140594 |
| 106/Wb/KOR/19       | 71/Wb/KOR/15        | 0.02294913 |
| 106/Wb/KOR/19       | S1133/Ck/CHN/14     | 0.02295623 |
| 113/Wb/KOR/15       | 2408/Ck/USA/83      | 0.02296310 |
| 2408/Ck/USA/83      | 71/Wb/KOR/15        | 0.02297112 |
| 2408/Ck/USA/83      | S1133/Ck/CHN/14     | 0.02297823 |
| 113/Wb/KOR/15       | 1733/Ck/USA/97      | 0.02298190 |
| 1733/Ck/USA/97      | 71/Wb/KOR/15        | 0.02298992 |
| 1733/Ck/USA/97      | S1133/Ck/CHN/14     | 0.02299703 |
| GuangxiR2/Ck/CHN/00 | GX110058/Ck/CHN/11  | 0.02301074 |
| 108/Wb/KOR/15       | GX110058/Ck/CHN/11  | 0.02302155 |
| 19/Wb/KOR/18        | GX110058/Ck/CHN/11  | 0.02303724 |
| GuangxiR1/Ck/CHN/00 | GX110058/Ck/CHN/11  | 0.02303766 |
| 19/Wb/KOR/15        | GX110058/Ck/CHN/11  | 0.02304359 |
| 106/Wb/KOR/19       | GX/2010/1/Ck/CHN/10 | 0.02304691 |
| 106/Wb/KOR/19       | SD10-1/Ck/CHN/09    | 0.02306389 |
| 2408/Ck/USA/83      | GX/2010/1/Ck/CHN/10 | 0.02306891 |
| 106/Wb/KOR/19       | 13/Wb/KOR/18        | 0.02308326 |
| 2408/Ck/USA/83      | SD10-1/Ck/CHN/09    | 0.02308589 |
| 1733/Ck/USA/97      | GX/2010/1/Ck/CHN/10 | 0.02308771 |
| 106/Wb/KOR/19       | YH/Dk/CHN/05        | 0.02310363 |
| 1733/Ck/USA/97      | SD10-1/Ck/CHN/09    | 0.02310469 |
| 2408/Ck/USA/83      | 13/Wb/KOR/18        | 0.02310526 |
| 106/Wb/KOR/19       | YJL/Dk/CHN/05       | 0.02310828 |
| GuangxiR2/Ck/CHN/00 | GX110116/Ck/CHN/11  | 0.02311086 |
| 106/Wb/KOR/19       | Avs-S1133/Ck/CHN/13 | 0.02311900 |
| 108/Wb/KOR/15       | GX110116/Ck/CHN/11  | 0.02312167 |
| 1733/Ck/USA/97      | 13/Wb/KOR/18        | 0.02312406 |
| 2408/Ck/USA/83      | YH/Dk/CHN/05        | 0.02312563 |
| 2408/Ck/USA/83      | YJL/Dk/CHN/05       | 0.02313028 |
| 19/Wb/KOR/18        | GX110116/Ck/CHN/11  | 0.02313736 |
| GuangxiR1/Ck/CHN/00 | GX110116/Ck/CHN/11  | 0.02313778 |
| 2408/Ck/USA/83      | Avs-S1133/Ck/CHN/13 | 0.02314100 |

|                     |                     |            |
|---------------------|---------------------|------------|
| 19/Wb/KOR/15        | GX110116/Ck/CHN/11  | 0.02314371 |
| 1733/Ck/USA/97      | YH/Dk/CHN/05        | 0.02314443 |
| 1733/Ck/USA/97      | YJL/Dk/CHN/05       | 0.02314908 |
| 1733/Ck/USA/97      | Avs-S1133/Ck/CHN/13 | 0.02315980 |
| D8/Ck/CAN/14        | R18-38167/Ck/USA/18 | 0.02408260 |
| R18-38167/Ck/USA/18 | D6/Ck/CAN/14        | 0.02410067 |
| 106/Wb/KOR/19       | GX110058/Ck/CHN/11  | 0.0258563  |
| 2408/Ck/USA/83      | GX110058/Ck/CHN/11  | 0.0258783  |
| 1733/Ck/USA/97      | GX110058/Ck/CHN/11  | 0.0258971  |
| 106/Wb/KOR/19       | GX110116/Ck/CHN/11  | 0.02595642 |
| 2408/Ck/USA/83      | GX110116/Ck/CHN/11  | 0.02597842 |
| 1733/Ck/USA/97      | GX110116/Ck/CHN/11  | 0.02599722 |
| 71/Wb/KOR/15        | C78/Ck/CHN/13       | 0.02606887 |
| 71/Wb/KOR/15        | SD09-1/Ck/CHN/09    | 0.02606887 |
| S1133/Ck/CHN/14     | C78/Ck/CHN/13       | 0.02607597 |
| S1133/Ck/CHN/14     | SD09-1/Ck/CHN/09    | 0.02607597 |
| 113/Wb/KOR/15       | C78/Ck/CHN/13       | 0.02608316 |
| 113/Wb/KOR/15       | SD09-1/Ck/CHN/09    | 0.02608316 |
| D1/Ck/CAN/14        | 01224B/Ck/USA/14    | 0.02736201 |
| 113/Wb/KOR/15       | 71/Wb/KOR/15        | 0.02875542 |
| 113/Wb/KOR/15       | S1133/Ck/CHN/14     | 0.02876253 |
| 71/Wb/KOR/15        | GX/2010/1/Ck/CHN/10 | 0.02883891 |
| S1133/Ck/CHN/14     | GX/2010/1/Ck/CHN/10 | 0.02884602 |
| 113/Wb/KOR/15       | GX/2010/1/Ck/CHN/10 | 0.02885321 |
| 71/Wb/KOR/15        | SD10-1/Ck/CHN/09    | 0.0288559  |
| S1133/Ck/CHN/14     | SD10-1/Ck/CHN/09    | 0.028863   |
| 113/Wb/KOR/15       | SD10-1/Ck/CHN/09    | 0.02887019 |
| 71/Wb/KOR/15        | 13/Wb/KOR/18        | 0.02887527 |
| S1133/Ck/CHN/14     | 13/Wb/KOR/18        | 0.02888237 |
| 113/Wb/KOR/15       | 13/Wb/KOR/18        | 0.02888956 |
| 71/Wb/KOR/15        | YH/Dk/CHN/05        | 0.02889563 |
| 71/Wb/KOR/15        | YJL/Dk/CHN/05       | 0.02890028 |
| S1133/Ck/CHN/14     | YH/Dk/CHN/05        | 0.02890274 |
| S1133/Ck/CHN/14     | YJL/Dk/CHN/05       | 0.02890739 |
| 113/Wb/KOR/15       | YH/Dk/CHN/05        | 0.02890993 |
| 71/Wb/KOR/15        | Avs-S1133/Ck/CHN/13 | 0.028911   |
| 113/Wb/KOR/15       | YJL/Dk/CHN/05       | 0.02891458 |
| S1133/Ck/CHN/14     | Avs-S1133/Ck/CHN/13 | 0.02891811 |
| 113/Wb/KOR/15       | Avs-S1133/Ck/CHN/13 | 0.0289253  |
| GX110058/Ck/CHN/11  | C78/Ck/CHN/13       | 0.02897604 |
| GX110058/Ck/CHN/11  | SD09-1/Ck/CHN/09    | 0.02897604 |
| D8/Ck/CAN/14        | D1/Ck/CAN/14        | 0.03039829 |

|                      |                            |                  |
|----------------------|----------------------------|------------------|
| D1/Ck/CAN/14         | D6/Ck/CAN/14               | 0.03041636       |
| 113/Wb/KOR/15        | GX110058/Ck/CHN/11         | 0.0316626        |
| GX110058/Ck/CHN/11   | GX/2010/1/Ck/CHN/10        | 0.03174609       |
| 71/Wb/KOR/15         | GX110116/Ck/CHN/11         | 0.03174842       |
| S1133/Ck/CHN/14      | GX110116/Ck/CHN/11         | 0.03175553       |
| 113/Wb/KOR/15        | GX110116/Ck/CHN/11         | 0.03176272       |
| GX110058/Ck/CHN/11   | SD10-1/Ck/CHN/09           | 0.03176307       |
| GX110058/Ck/CHN/11   | 13/Wb/KOR/18               | 0.03178244       |
| GX110058/Ck/CHN/11   | YH/Dk/CHN/05               | 0.03180281       |
| GX110058/Ck/CHN/11   | YJL/Dk/CHN/05              | 0.03180746       |
| GX110058/Ck/CHN/11   | Avs-S1133/Ck/CHN/13        | 0.03181818       |
| D12/Ck/CAN/14        | D3/Ck/CAN/14               | 0.03354041       |
| GX110058/Ck/CHN/11   | GX110116/Ck/CHN/11         | 0.0346556        |
| D1/Ck/CAN/14         | R18-38167/Ck/USA/18        | 0.03640689       |
| 918/Ck/CHN/00        | 1017-1/Ck/TAI/92           | 0.0371719        |
| 01224B/Ck/USA/14     | D3/Ck/CAN/14               | 0.03949648       |
| D4/Ck/CAN/14         | D11/Ck/CAN/14              | 0.04096062       |
| 875-Bi-05/Ck/HUN/05  | 27614/Ck/USA/13            | 0.04109293       |
| 878-Bi-05/Ck/HUN/05  | 27614/Ck/USA/13            | 0.04109293       |
| D8/Ck/CAN/14         | D3/Ck/CAN/14               | 0.04253277       |
| D6/Ck/CAN/14         | D3/Ck/CAN/14               | 0.04255083       |
| D12/Ck/CAN/14        | LY383/Ck/CHN/16            | 0.04297772       |
| D12/Ck/CAN/14        | V-ARV-SD26/Ck/CHN/20       | 0.04297772       |
| R18-38167/Ck/USA/18  | D3/Ck/CAN/14               | 0.04854136       |
| 01224B/Ck/USA/14     | LY383/Ck/CHN/16            | 0.0489338        |
| 01224B/Ck/USA/14     | V-ARV-SD26/Ck/CHN/20       | 0.0489338        |
| 875-Bi-05/Ck/HUN/05  | K1600600/Ck/USA/16         | 0.05116062       |
| 878-Bi-05/Ck/HUN/05  | K1600600/Ck/USA/16         | 0.05116062       |
| D8/Ck/CAN/14         | LY383/Ck/CHN/16            | 0.05197008       |
| D8/Ck/CAN/14         | V-ARV-SD26/Ck/CHN/20       | 0.05197008       |
| D6/Ck/CAN/14         | LY383/Ck/CHN/16            | 0.05198815       |
| D6/Ck/CAN/14         | V-ARV-SD26/Ck/CHN/20       | 0.05198815       |
| <b>D12/Ck/CAN/14</b> | <b>R18-37308/Ck/USA/18</b> | <b>0.0563058</b> |
| R18-38167/Ck/USA/18  | LY383/Ck/CHN/16            | 0.05797868       |
| R18-38167/Ck/USA/18  | V-ARV-SD26/Ck/CHN/20       | 0.05797868       |
| 01224B/Ck/USA/14     | R18-37308/Ck/USA/18        | 0.06226187       |
| D1/Ck/CAN/14         | LY383/Ck/CHN/16            | 0.06427205       |
| D1/Ck/CAN/14         | V-ARV-SD26/Ck/CHN/20       | 0.06427205       |
| D8/Ck/CAN/14         | R18-37308/Ck/USA/18        | 0.06529816       |
| D6/Ck/CAN/14         | R18-37308/Ck/USA/18        | 0.06531622       |
| R18-38167/Ck/USA/18  | R18-37308/Ck/USA/18        | 0.07130675       |
| 27614/Ck/USA/13      | K1600600/Ck/USA/16         | 0.0717574        |

|                     |                         |            |
|---------------------|-------------------------|------------|
| 875-Bi-05/Ck/HUN/05 | T1502036/Ck/USA/15      | 0.07384464 |
| 878-Bi-05/Ck/HUN/05 | T1502036/Ck/USA/15      | 0.07384464 |
| D3/Ck/CAN/14        | LY383/Ck/CHN/16         | 0.07640652 |
| D3/Ck/CAN/14        | V-ARV-SD26/Ck/CHN/20    | 0.07640652 |
| D1/Ck/CAN/14        | R18-37308/Ck/USA/18     | 0.07760013 |
| P3/Cro/JAP/12       | PHC-2020-0545/Ck/CHN/20 | 0.07832624 |
| 875-Bi-05/Ck/HUN/05 | 115940/Ck/USA/16        | 0.07857908 |
| 878-Bi-05/Ck/HUN/05 | 115940/Ck/USA/16        | 0.07857908 |
| R18-37308/Ck/USA/18 | LY383/Ck/CHN/16         | 0.0790377  |
| R18-37308/Ck/USA/18 | V-ARV-SD26/Ck/CHN/20    | 0.0790377  |
| D3/Ck/CAN/14        | R18-37308/Ck/USA/18     | 0.0897346  |
| 27614/Ck/USA/13     | T1502036/Ck/USA/15      | 0.09444142 |
| 918/Ck/CHN/00       | 3211-V/Ck/HUN/02        | 0.0952719  |
| 27614/Ck/USA/13     | 115940/Ck/USA/16        | 0.09917586 |
| T1502036/Ck/USA/15  | 115940/Ck/USA/16        | 0.10087041 |
| 1017-1/Ck/TAI/92    | 3211-V/Ck/HUN/02        | 0.10271708 |

The strains displaying the closest evolutionary distance to our isolates, are shown in bold red. The evolutionary distance is shown up to  $d = 0.10271708$ .

**Table S3.** Accession numbers of sequences used for phylogenetic analysis of ARV oC for genotyping.

| Accession No. | Isolate                | Host               | Country | Year | Abbreviated name        |
|---------------|------------------------|--------------------|---------|------|-------------------------|
| AB914766      | Pycno-1                | Brown-eared Bulbul | Japan   | 2014 | Pycno-1/Bul/JAP/14      |
| KX398328      | 17227-M-10             | Chicken            | Hungary | 2010 | 17227-M/Ck/HUN/10       |
| KF741752      | GX110116               | Chicken            | China   | 2011 | GX110116/Ck/CHN/11      |
| MW357869      | 13                     | wild bird          | Korea   | 2018 | 13/Wb/KOR/18            |
| DQ198854      | YH                     | Muscovy duck       | China   | 2005 | YH/Dk/CHN/05            |
| DQ191363      | YJL                    | Muscovy duck       | China   | 2005 | YJL/Dk/CHN/05           |
| KJ476705      | GX/2010/1              | Chicken            | China   | 2010 | GX/2010/1/Ck/CHN/10     |
| KF741772      | Avs-S1133              | Chicken            | China   | 2013 | Avs-S1133/Ck/CHN/13     |
| KP288863      | SD10-1                 | Chicken            | China   | 2009 | SD10-1/Ck/CHN/09        |
| KF741722      | C78                    | Chicken            | China   | 2013 | C78/Ck/CHN/13           |
| KP288853      | SD09-1                 | Chicken            | China   | 2009 | SD09-1/Ck/CHN/09        |
| KF741742      | GX110058               | Chicken            | China   | 2011 | GX110058/Ck/CHN/11      |
| KF741762      | S1133                  | Chicken            | China   | 2014 | S1133/Ck/CHN/14         |
| MW357865      | 71                     | wild bird          | Korea   | 2015 | 71/Wb/KOR/15            |
| AF204945      | 2408                   | Chicken            | USA     | 1983 | 2408/Ck/USA/83          |
| KF741732      | GuangxiR2              | Chicken            | China   | 2000 | GuangxiR2/Ck/CHN/00     |
| KF741712      | 1733                   | Chicken            | USA     | 1997 | 1733/Ck/USA/97          |
| KC183744      | GuangxiR1              | Chicken            | China   | 2000 | GuangxiR1/Ck/CHN/00     |
| MW357867      | 113                    | wild bird          | Korea   | 2015 | 113/Wb/KOR/15           |
| MW357872      | 106                    | wild bird          | Korea   | 2019 | 106/Wb/KOR/19           |
| EF057398      | T-98                   | Chicken            | China   | 2006 | T-98/Ck/CHN/06          |
| KY860636      | MS01                   | Chicken            | China   | 2017 | MS01/Ck/CHN/17          |
| EF057397      | C-98                   | Chicken            | China   | 2006 | C-98/Ck/CHN/06          |
| MW357870      | 19                     | wild bird          | Korea   | 2018 | 19/Wb/KOR/18            |
| MW357863      | 19                     | wild bird          | Korea   | 2015 | 19/Wb/KOR/15            |
| MW357871      | 205                    | wild bird          | Korea   | 2018 | 205/Wb/KOR/18           |
| MW357868      | 157                    | wild bird          | Korea   | 2015 | 157/Wb/KOR/15           |
| MW357864      | 48                     | wild bird          | Korea   | 2015 | 48/Wb/KOR/15            |
| MW357866      | 108                    | wild bird          | Korea   | 2015 | 108/Wb/KOR/15           |
| KF741702      | 526                    | Chicken            | China   | 2013 | 526/Ck/CHN/13           |
| MW002453      | Reo/Ck/TX/115940       | Chicken            | USA     | 2016 | 115940/Ck/USA/16        |
| MK616649      | T1502036               | Chicken            | USA     | 2015 | T1502036/Ck/USA/15      |
| MK416139      | K1600600               | Chicken            | USA     | 2016 | K1600600/Ck/USA/16      |
| KU169294      | Reo/PA/Layer/27614/13  | Layer Chicken      | USA     | 2013 | 27614/Ck/USA/13         |
| KX398248      | 875-Bi-05              | Chicken            | Hungary | 2005 | 875-Bi-05/Ck/HUN/05     |
| KX398258      | 878-Bi-05              | Chicken            | Hungary | 2005 | 878-Bi-05/Ck/HUN/05     |
| MN879660      | D7                     | Chicken            | Canada  | 2014 | D7/Ck/CAN/14            |
| KP173689      | Reo/PA/Turkey/22342/13 | Turkey             | USA     | 2013 | 22342/Tk/USA/13         |
| KR476804      | D1007                  | Partridge          | Hungary | 2008 | D1007/PRT/HUN/08        |
| MF686704      | K738/14                | Chicken            | Korea   | 2014 | K738/Ck/KOR/14          |
| MW174790      | PHC-2020-0545          | Chicken            | China   | 2020 | PHC-2020-0545/Ck/CHN/20 |
| LC164026      | P3                     | Crow               | Japan   | 2012 | P3/Cro/JAP/12           |
| MN879640      | D5                     | Chicken            | Canada  | 2014 | D5/Ck/CAN/14            |
| AF297214      | 916                    | Chicken            | Taiwan  | 1992 | 916/Ck/TAI/92           |
| KX398288      | 3457-M-11              | Chicken            | Hungary | 2011 | 3457-M/Ck/HUN/11        |
| KC865792      | T1781                  | Chicken            | Hungary | 2012 | T1781/Ck/HUN/12         |
| KT428304      | Reo/PA/Layer/01224A/14 | Layer chicken      | USA     | 2014 | 01224A/Ck/USA/14        |
| OK077999      | AHZJ19                 | Chicken            | China   | 2019 | AHZJ19/Ck/CHN/19        |

|           |                        |                 |             |      |                      |
|-----------|------------------------|-----------------|-------------|------|----------------------|
| MN879690  | D10                    | Chicken         | Canada      | 2014 | D10/Ck/CAN/14        |
| KX398278  | 3211-V-02              | Chicken         | Hungary     | 2002 | 3211-V/Ck/HUN/02     |
| AF297216  | 1017-1                 | Chicken         | Taiwan      | 1992 | 1017-1/Ck/TAI/92     |
| AF297215  | 918                    | Chicken         | China       | 2000 | 918/Ck/CHN/00        |
| MW394462  | SDYT2020               | Chicken         | China       | 2020 | SDYT2020/Ck/CHN/20   |
| NC_015132 | AVS-B                  | Chicken         | USA         | 2006 | AVS-B/Ck/USA/06      |
| MK583337  | K1600657               | Chicken         | USA         | 2016 | K1600657/Ck/USA/16   |
| MN879700  | D11                    | Chicken         | Canada      | 2014 | D11/Ck/CAN/14        |
| MN879630  | D4                     | Chicken         | Canada      | 2014 | D4/Ck/CAN/14         |
| KX398318  | 17203-M-06             | Chicken         | Hungary     | 2006 | 17203-M/Ck/HUN/06    |
| AF354230  | NLI12 96M              | Chicken         | Netherlands | 2001 | NLI12-96M/Ck/NLD/01  |
| MN879680  | D9                     | Chicken         | Canada      | 2013 | D9/Ck/CAN/13         |
| MF183217  | LY383                  | Chicken         | China       | 2016 | LY383/Ck/CHN/16      |
| MW244848  | V-ARV-SD26             | Chicken         | China       | 2020 | V-ARV-SD26/Ck/CHN/20 |
| OR546357  | R18-37308              | Broiler Chicken | USA         | 2018 | R18-37308/Ck/USA/18  |
| MN879620  | D3                     | Chicken         | Canada      | 2014 | D3/Ck/CAN/14         |
| MN879650  | D6                     | Chicken         | Canada      | 2014 | D6/Ck/CAN/14         |
| OR546367  | R18-38167              | Broiler Chicken | USA         | 2018 | R18-38167/Ck/USA/18  |
| MN879710  | D12                    | Chicken         | Canada      | 2014 | D12/Ck/CAN/14        |
| KT428314  | Reo/PA/Layer/01224B/14 | Layer Chicken   | USA         | 2014 | 01224B/Ck/USA/14     |
| MN879600  | D1                     | Chicken         | Canada      | 2014 | D1/Ck/CAN/14         |
| MN879670  | D8                     | Chicken         | Canada      | 2014 | D8/Ck/CAN/14         |
| JX478256  | 091                    | Duck            | China       | 2009 | 091/Dk/CHN/09        |

\*Abbreviated name followed the order of Isolate\_name/Host/  
Country\_of\_origin/Collection\_year.

**Table S4.** Reference sequences used for phylogenetic analysis of genomic amino acid sequences.

| Reference strain | σC based genotype | Included/excluded for phylogenetic analysis of genomic ORFs |                |                |                |    |     |            |                |    |                |    |     |
|------------------|-------------------|-------------------------------------------------------------|----------------|----------------|----------------|----|-----|------------|----------------|----|----------------|----|-----|
|                  |                   | λA                                                          | λB             | λC             | μA             | μB | μNS | S1 segment |                |    | σA             | σB | σNS |
|                  |                   |                                                             |                |                |                |    |     | P10        | P17            | σC |                |    |     |
| S1133            | I                 | ✓                                                           | ✓              | ✓              | ✓              | ✓  | ✓   | ✓          | ✓              | ✓  | ✓              | ✓  | ✓   |
| 1733             | I                 | ✓                                                           | ✓              | ✓              | ✓              | ✓  | ✓   | ✓          | ✓              | ✓  | ✓              | ✓  | ✓   |
| C78              | I                 | ✓                                                           | ✓              | ✓              | ✓              | ✓  | ✓   | ✓          | ✓              | ✓  | ✓              | ✓  | ✓   |
| T-98             | I                 | ✓                                                           | ✓              | ✓              | ✓              | ✓  | ✓   | ✓          | ✓              | ✓  | ✓              | ✓  | ✓   |
| MS01             | I                 | ✓                                                           | ✓              | ✓              | ✓              | ✓  | ✓   | ✓          | ✓              | ✓  | ✓              | ✓  | ✓   |
| 526              | I                 | ✓                                                           | ✓              | ✓              | ✓              | ✓  | ✓   | ✓          | ✓              | ✓  | ✓              | ✓  | ✓   |
| 22342            | II                | ✓                                                           | ✓              | ✓              | ✓              | ✓  | ✓   | ✓          | ✓              | ✓  | ✓              | ✓  | ✓   |
| PHC-2020-0545    | II                | ✓                                                           | ✓              | ✓              | ✓              | ✓  | ✓   | ✓          | ✓              | ✓  | ✓              | ✓  | ✓   |
| D1007            | II                | ✓                                                           | x <sup>‡</sup> | x <sup>‡</sup> | ✓              | ✓  | ✓   | ✓          | ✓              | ✓  | ✓              | ✓  | ✓   |
| 01224A           | III               | ✓                                                           | ✓              | ✓              | ✓              | ✓  | ✓   | ✓          | ✓              | ✓  | ✓              | ✓  | ✓   |
| AHZJ19           | III               | ✓                                                           | ✓              | ✓              | ✓              | ✓  | ✓   | ✓          | ✓              | ✓  | ✓              | ✓  | ✓   |
| 3211-V           | IV                | ✓                                                           | ✓              | ✓              | ✓              | ✓  | ✓   | ✓          | ✓              | ✓  | ✓              | ✓  | ✓   |
| SDYT2020         | V                 | ✓                                                           | ✓              | ✓              | ✓              | ✓  | ✓   | ✓          | ✓              | ✓  | ✓              | ✓  | ✓   |
| K1600657         | V                 | ✓                                                           | ✓              | ✓              | ✓              | ✓  | ✓   | ✓          | x <sup>‡</sup> | ✓  | x <sup>Δ</sup> | ✓  | ✓   |
| LY383            | VI                | ✓                                                           | ✓              | ✓              | ✓              | ✓  | ✓   | ✓          | ✓              | ✓  | ✓              | ✓  | ✓   |
| V-ARV-SD26       | VI                | ✓                                                           | ✓              | ✓              | ✓              | ✓  | ✓   | ✓          | ✓              | ✓  | ✓              | ✓  | ✓   |
| Pycno-1          | Outgroup 1        | x <sup>‡</sup>                                              | ✓              | ✓              | x <sup>‡</sup> | ✓  | ✓   | ✓          | ✓              | ✓  | ✓              | ✓  | ✓   |
| 091              | Outgroup 2*       | ✓                                                           | ✓              | ✓              | ✓              | ✓  | ✓   | ✓          | x <sup>‡</sup> | ✓  | ✓              | ✓  | ✓   |

\*091 strain (a duck ARV strain) that was found clustered in a separate cluster according to  $\sigma$ C (cluster VII), however was also proposed to be used as outgroup in case of the Pycno-1 (bulbul ARV strain) which is extremely evolutionary diverse and masking variations among other strains tested. ‡: This strain sequence contains degenerate nucleotides that impacted negatively the obtained amino acid sequence.

<sup>Δ</sup>:  $\sigma$ A sequence of this isolate is incomplete.

✓ denotes included in analysis of this genomic segment, whereas x refers to exclusion of this isolate from phylogenetic analysis of this protein sequence. ‡: refers to highly diverse sequence masking evolutionary variations between sequences.

**Table S5.** Evolutionary divergence estimates between  $\lambda$ A sequences of ARV isolates.

| Species 1                  | Species 2               | Dist              |
|----------------------------|-------------------------|-------------------|
| LY383/Ck/CHN/16            | V-ARV-SD26/Ck/CHN/20    | 0.00003289        |
| 1733/Ck/USA/97             | C78/Ck/CHN/13           | 0.00081168        |
| MS01/Ck/CHN/19             | T-98/Ck/CHN/06          | 0.00159225        |
| S1133/Ck/CHN/14            | 1733/Ck/USA/97          | 0.00160221        |
| S1133/Ck/CHN/14            | C78/Ck/CHN/13           | 0.00237003        |
| 1733/Ck/USA/97             | MS01/Ck/CHN/19          | 0.00318881        |
| PHC-2020-0545/Ck/CHN/20    | LY383/Ck/CHN/16         | 0.00323709        |
| PHC-2020-0545/Ck/CHN/20    | V-ARV-SD26/Ck/CHN/20    | 0.00324805        |
| MS01/Ck/CHN/19             | C78/Ck/CHN/13           | 0.00397855        |
| 1733/Ck/USA/97             | T-98/Ck/CHN/06          | 0.00475912        |
| S1133/Ck/CHN/14            | MS01/Ck/CHN/19          | 0.00476909        |
| SDYT2020/Ck/CHN/20         | AHZJ19/Ck/CHN/19        | 0.00478130        |
| C78/Ck/CHN/13              | T-98/Ck/CHN/06          | 0.00554887        |
| S1133/Ck/CHN/14            | T-98/Ck/CHN/06          | 0.00633941        |
| PHC-2020-0545/Ck/CHN/20    | SDYT2020/Ck/CHN/20      | 0.01195701        |
| PHC-2020-0545/Ck/CHN/20    | AHZJ19/Ck/CHN/19        | 0.01222139        |
| 526/Ck/CHN/13              | K1600657/Ck/USA/16      | 0.01501246        |
| LY383/Ck/CHN/16            | SDYT2020/Ck/CHN/20      | 0.01517217        |
| V-ARV-SD26/Ck/CHN/20       | SDYT2020/Ck/CHN/20      | 0.01518313        |
| LY383/Ck/CHN/16            | AHZJ19/Ck/CHN/19        | 0.01543655        |
| V-ARV-SD26/Ck/CHN/20       | AHZJ19/Ck/CHN/19        | 0.01544752        |
| 1733/Ck/USA/97             | 526/Ck/CHN/13           | 0.01636565        |
| MS01/Ck/CHN/19             | 526/Ck/CHN/13           | 0.01638902        |
| C78/Ck/CHN/13              | 526/Ck/CHN/13           | 0.01715539        |
| 1733/Ck/USA/97             | SDYT2020/Ck/CHN/20      | 0.01759093        |
| MS01/Ck/CHN/19             | SDYT2020/Ck/CHN/20      | 0.01761430        |
| 1733/Ck/USA/97             | AHZJ19/Ck/CHN/19        | 0.01785532        |
| MS01/Ck/CHN/19             | AHZJ19/Ck/CHN/19        | 0.01787869        |
| 1733/Ck/USA/97             | PHC-2020-0545/Ck/CHN/20 | 0.01791995        |
| MS01/Ck/CHN/19             | PHC-2020-0545/Ck/CHN/20 | 0.01794332        |
| S1133/Ck/CHN/14            | 526/Ck/CHN/13           | 0.01794593        |
| T-98/Ck/CHN/06             | 526/Ck/CHN/13           | 0.01795934        |
| C78/Ck/CHN/13              | SDYT2020/Ck/CHN/20      | 0.01838068        |
| C78/Ck/CHN/13              | AHZJ19/Ck/CHN/19        | 0.01864506        |
| C78/Ck/CHN/13              | PHC-2020-0545/Ck/CHN/20 | 0.01870970        |
| <b>R18-37308/Ck/USA/18</b> | <b>01224A/Ck/USA/14</b> | <b>0.01901625</b> |
| S1133/Ck/CHN/14            | SDYT2020/Ck/CHN/20      | 0.01917121        |
| T-98/Ck/CHN/06             | SDYT2020/Ck/CHN/20      | 0.01918462        |
| S1133/Ck/CHN/14            | AHZJ19/Ck/CHN/19        | 0.01943560        |

|                            |                            |                   |
|----------------------------|----------------------------|-------------------|
| T-98/Ck/CHN/06             | AHZJ19/Ck/CHN/19           | 0.01944901        |
| S1133/Ck/CHN/14            | PHC-2020-0545/Ck/CHN/20    | 0.01950023        |
| T-98/Ck/CHN/06             | PHC-2020-0545/Ck/CHN/20    | 0.01951364        |
| 526/Ck/CHN/13              | SDYT2020/Ck/CHN/20         | 0.01976695        |
| 526/Ck/CHN/13              | AHZJ19/Ck/CHN/19           | 0.02003134        |
| 526/Ck/CHN/13              | PHC-2020-0545/Ck/CHN/20    | 0.02009597        |
| <b>R18-37308/Ck/USA/18</b> | <b>R18-38167/Ck/USA/18</b> | <b>0.02042379</b> |
| 1733/Ck/USA/97             | LY383/Ck/CHN/16            | 0.02113511        |
| 1733/Ck/USA/97             | V-ARV-SD26/Ck/CHN/20       | 0.02114607        |
| MS01/Ck/CHN/19             | LY383/Ck/CHN/16            | 0.02115848        |
| MS01/Ck/CHN/19             | V-ARV-SD26/Ck/CHN/20       | 0.02116945        |

The strains displaying the closest evolutionary distance to our isolates, are shown in bold red. The evolutionary distance is shown up to  $d = 0.02116945$ .

**TableS6.** The characteristic amino acid substitutions in the L-class genomic segments.

| Strain        | Genotypic cluster | Host      | Lambda A amino acids |    |    |    |    |     |     |     |     |     |     |
|---------------|-------------------|-----------|----------------------|----|----|----|----|-----|-----|-----|-----|-----|-----|
|               |                   |           | 31                   | 38 | 45 | 57 | 78 | 112 | 116 | 138 | 228 | 300 | 313 |
| S1133         | I                 | Chicken   | I                    | D  | V  | T  | A  | V   | K   | S   | A   | T   | K   |
| R18-37308*    | III               | Chicken   | D                    | E  | A  | A  | S  | M   | *   | *   | T   | *   | *   |
| R18-38167     | III               | Chicken   | T                    | E  | *  | *  | K  | *   | R   | A   | T   | N   | N   |
| 01224A        | III               | Chicken   | T                    | E  | *  | *  | S  | *   | *   | *   | *   | *   | *   |
| 1733          | I                 | Chicken   | *                    | *  | *  | *  | *  | *   | *   | *   | *   | *   | *   |
| C78           | I                 | Chicken   | *                    | *  | *  | *  | *  | *   | *   | *   | *   | *   | *   |
| MS01          | I                 | Chicken   | *                    | *  | *  | *  | *  | *   | *   | *   | *   | *   | *   |
| T-98          | I                 | Chicken   | *                    | *  | *  | *  | *  | *   | *   | *   | *   | *   | *   |
| 526           | II                | Chicken   | T                    | *  | *  | *  | T  | *   | *   | *   | *   | *   | *   |
| K1600657      | II                | Chicken   | T                    | *  | *  | *  | T  | *   | *   | *   | *   | *   | *   |
| SDYT2020      | IV                | Chicken   | A                    | *  | *  | *  | *  | *   | *   | *   | *   | *   | *   |
| AHZJ19        | IV                | Chicken   | A                    | *  | *  | *  | *  | *   | *   | *   | *   | *   | *   |
| PHC-2020-0545 | IV                | Chicken   | T                    | *  | *  | *  | *  | *   | *   | *   | *   | *   | *   |
| LY383         | IV                | Chicken   | T                    | *  | *  | *  | *  | *   | *   | *   | *   | P   | *   |
| V-ARV-SD26    | IV                | Chicken   | T                    | *  | *  | *  | *  | *   | *   | *   | *   | P   | *   |
| 3211-V        | V                 | Chicken   | T                    | K  | *  | *  | *  | *   | *   | *   | *   | *   | *   |
| 22342         | VI                | Turkey    | S                    | K  | *  | *  | *  | *   | *   | *   | *   | *   | *   |
| D1007         | VII               | Partridge | T                    | K  | *  | K  | V  | *   | *   | *   | S   | *   | *   |
| 091           | Outgroup          | Duck      | T                    | V  | *  | *  | *  | *   | *   | *   | S   | *   | R   |

| Strain        | Genotypic cluster | Host    | Lambda B amino acids |    |    |    |     |     |     |     |     |     |     |      |
|---------------|-------------------|---------|----------------------|----|----|----|-----|-----|-----|-----|-----|-----|-----|------|
|               |                   |         | 26                   | 84 | 88 | 89 | 152 | 233 | 293 | 551 | 638 | 929 | 928 | 1062 |
| S1133         | Ia                | Chicken | K                    | Q  | P  | D  | S   | T   | V   | H   | M   | V   | N   | E    |
| R18-37308     | Id                | Chicken | T                    | R  | D  | E  | T   | A   | I   | Y   | *   | S   | T   | *    |
| K1600657      | Id                | Chicken | *                    | *  | D  | *  | T   | A   | *   | *   | *   | I   | T   | *    |
| T-98          | Ia                | Chicken | *                    | *  | *  | *  | *   | *   | *   | *   | *   | *   | *   | *    |
| MS01          | Ia                | Chicken | *                    | *  | *  | *  | *   | *   | *   | *   | *   | *   | *   | *    |
| 1733          | Ia                | Chicken | *                    | *  | *  | *  | *   | *   | *   | *   | *   | *   | *   | *    |
| C78           | Ia                | Chicken | *                    | *  | *  | *  | *   | *   | *   | *   | *   | *   | *   | *    |
| LY383         | Ib                | Chicken | *                    | *  | *  | *  | *   | *   | *   | *   | *   | *   | *   | *    |
| V-ARV-SD26    | Ib                | Chicken | *                    | *  | *  | *  | *   | *   | *   | *   | *   | *   | *   | *    |
| PHC-2020-0545 | Ib                | Chicken | *                    | *  | *  | *  | *   | *   | *   | *   | *   | *   | *   | *    |
| SDYT2020      | Ib                | Chicken | *                    | *  | *  | *  | *   | *   | *   | *   | *   | *   | *   | *    |
| 3211-V        | Ic                | Chicken | *                    | *  | *  | *  | *   | *   | *   | *   | *   | A   | *   | *    |
| R18-38167     | II                | Chicken | *                    | *  | A  | *  | A   | *   | *   | *   | V   | *   | *   | D    |
| 526           | II                | Chicken | *                    | *  | A  | *  | A   | *   | *   | *   | V   | *   | *   | D    |
| 01224A        | II                | Chicken | *                    | *  | *  | *  | *   | *   | *   | *   | V   | *   | *   | D    |
| 22342         | III               | Turkey  | *                    | *  | S  | *  | *   | *   | *   | *   | *   | *   | *   | *    |
| AHZJ19        | IV                | Chicken | E                    | *  | S  | *  | *   | *   | *   | *   | *   | A   | *   | *    |
| 091           | V                 | Duck    | D                    | H  | S  | *  | *   | *   | *   | *   | *   | A   | *   | *    |

| Strain | Genotypic cluster | Host | Lambda C amino acids |    |    |    |     |     |     |
|--------|-------------------|------|----------------------|----|----|----|-----|-----|-----|
|        |                   |      | 23                   | 48 | 49 | 50 | 269 | 293 | 472 |

| <b>S1133</b>     | <b>I</b>  | <b>Chicken</b> | <b>T</b> | <b>G</b> | <b>N</b> | <b>D</b> | <b>P</b> | <b>N</b> | <b>S</b> | <b>D</b> | <b>I</b> | <b>T</b> |
|------------------|-----------|----------------|----------|----------|----------|----------|----------|----------|----------|----------|----------|----------|
| <b>R18-37308</b> | <b>II</b> | <b>Chicken</b> | <b>*</b> | <b>D</b> | <b>R</b> | <b>N</b> | <b>S</b> | <b>*</b> | <b>*</b> | <b>*</b> | <b>*</b> | <b>A</b> |
| <b>R18-38167</b> | <b>II</b> | <b>Chicken</b> | <b>S</b> | <b>D</b> | <b>R</b> | <b>N</b> | <b>*</b> | <b>S</b> | <b>A</b> | <b>N</b> | <b>V</b> | <b>*</b> |
| K1600657         | II        | Chicken        | *        | D        | R        | N        | *        | *        | *        | *        | *        | *        |
| 526              | II        | Chicken        | *        | D        | R        | N        | *        | *        | *        | *        | *        | *        |
| SDYT2020         | II        | Chicken        | *        | D        | R        | N        | *        | *        | *        | *        | *        | *        |
| PHC-2020-0545    | II        | Chicken        | *        | D        | R        | N        | *        | *        | *        | *        | *        | *        |
| 01224A           | II        | Chicken        | *        | D        | R        | N        | *        | *        | *        | *        | *        | *        |
| 22342            | II        | Turkey         | *        | *        | Q        | *        | *        | *        | *        | *        | *        | *        |
| 1733             | I         | Chicken        | *        | *        | *        | *        | *        | *        | *        | *        | *        | *        |
| T-98             | I         | Chicken        | *        | *        | *        | *        | *        | *        | *        | *        | *        | *        |
| MS01             | I         | Chicken        | *        | *        | *        | *        | *        | *        | *        | *        | *        | *        |
| C78              | I         | Chicken        | *        | *        | *        | *        | *        | *        | *        | *        | *        | *        |
| 3211-V           | I         | Chicken        | *        | N        | *        | *        | *        | *        | *        | E        | *        | *        |
| LY383            | I         | Chicken        | *        | N        | *        | *        | *        | *        | *        | E        | *        | *        |
| V-ARV-SD26       | I         | Chicken        | *        | N        | *        | *        | *        | *        | *        | E        | *        | *        |
| AHZJ19           | I         | Chicken        | *        | H        | *        | *        | *        | *        | *        | E        | *        | *        |
| 091              | III       | Duck           | *        | A        | Q        | *        | *        | T        | *        | *        | L        | *        |

\*Our strains are denoted by red text. Unique amino acid substitutions are referred by bold red text. The highlighted asterisks refer to the amino acids identical to the reference sequence (the vaccine strain: S1133) displayed in bold.

**Table S7.** Evolutionary divergence estimates between  $\lambda$ B sequences of ARV isolates.

| Species 1                  | Species 2                  | Dist              |
|----------------------------|----------------------------|-------------------|
| LY383/Ck/CHN/16            | V-ARV-SD26/Ck/CHN/20       | 0.00000200        |
| 1733/Ck/USA/97             | MS01/Ck/CHN/19             | 0.00081200        |
| T-98/Ck/CHN/06             | MS01/Ck/CHN/19             | 0.00243469        |
| 1733/Ck/USA/97             | T-98/Ck/CHN/06             | 0.00324469        |
| S1133/Ck/CHN/14            | MS01/Ck/CHN/19             | 0.00325242        |
| 1733/Ck/USA/97             | S1133/Ck/CHN/14            | 0.00406242        |
| S1133/Ck/CHN/14            | T-98/Ck/CHN/06             | 0.00568311        |
| MS01/Ck/CHN/19             | C78/Ck/CHN/13              | 0.00570649        |
| 1733/Ck/USA/97             | C78/Ck/CHN/13              | 0.00651449        |
| PHC-2020-0545/Ck/CHN/20    | SDYT2020/Ck/CHN/20         | 0.00736260        |
| T-98/Ck/CHN/06             | C78/Ck/CHN/13              | 0.00813919        |
| S1133/Ck/CHN/14            | C78/Ck/CHN/13              | 0.00895691        |
| <b>R18-37308/Ck/USA/18</b> | <b>K1600657/Ck/USA/16</b>  | <b>0.01081368</b> |
| <b>526/Ck/CHN/13</b>       | <b>R18-38167/Ck/USA/18</b> | <b>0.01221494</b> |
| LY383/Ck/CHN/16            | SDYT2020/Ck/CHN/20         | 0.01233924        |
| V-ARV-SD26/Ck/CHN/20       | SDYT2020/Ck/CHN/20         | 0.01233924        |
| LY383/Ck/CHN/16            | PHC-2020-0545/Ck/CHN/20    | 0.01461520        |
| V-ARV-SD26/Ck/CHN/20       | PHC-2020-0545/Ck/CHN/20    | 0.01461520        |
| LY383/Ck/CHN/16            | MS01/Ck/CHN/19             | 0.01634656        |
| V-ARV-SD26/Ck/CHN/20       | MS01/Ck/CHN/19             | 0.01634656        |
| LY383/Ck/CHN/16            | 1733/Ck/USA/97             | 0.01715456        |
| V-ARV-SD26/Ck/CHN/20       | 1733/Ck/USA/97             | 0.01715456        |
| LY383/Ck/CHN/16            | T-98/Ck/CHN/06             | 0.01877925        |
| V-ARV-SD26/Ck/CHN/20       | T-98/Ck/CHN/06             | 0.01877925        |
| LY383/Ck/CHN/16            | S1133/Ck/CHN/14            | 0.01959698        |
| V-ARV-SD26/Ck/CHN/20       | S1133/Ck/CHN/14            | 0.01959698        |
| SDYT2020/Ck/CHN/20         | MS01/Ck/CHN/19             | 0.02188069        |
| LY383/Ck/CHN/16            | C78/Ck/CHN/13              | 0.02204705        |
| V-ARV-SD26/Ck/CHN/20       | C78/Ck/CHN/13              | 0.02204705        |
| SDYT2020/Ck/CHN/20         | 1733/Ck/USA/97             | 0.02268869        |
| MS01/Ck/CHN/19             | K1600657/Ck/USA/16         | 0.02333990        |
| 1733/Ck/USA/97             | K1600657/Ck/USA/16         | 0.02414790        |
| PHC-2020-0545/Ck/CHN/20    | MS01/Ck/CHN/19             | 0.02415665        |
| SDYT2020/Ck/CHN/20         | T-98/Ck/CHN/06             | 0.02431338        |
| PHC-2020-0545/Ck/CHN/20    | 1733/Ck/USA/97             | 0.02496465        |
| SDYT2020/Ck/CHN/20         | S1133/Ck/CHN/14            | 0.02513110        |

The strains displaying the closest evolutionary distance to our isolates, are shown in bold red. The evolutionary distance is shown up to  $d = 0.02513110$ .

**Table S8.** Evolutionary divergence estimates between  $\lambda$ C sequences of ARV isolates.

| Species 1                  | Species 2                  | Dist              |
|----------------------------|----------------------------|-------------------|
| T-98/Ck/CHN/06             | MS01/Ck/CHN/19             | 0.00081872        |
| 1733/Ck/USA/97             | MS01/Ck/CHN/19             | 0.00081894        |
| 1733/Ck/USA/97             | T-98/Ck/CHN/06             | 0.00157096        |
| S1133/Ck/CHN/14            | MS01/Ck/CHN/19             | 0.00159453        |
| LY383/Ck/CHN/16            | V-ARV-SD26/Ck/CHN/20       | 0.00236270        |
| T-98/Ck/CHN/06             | S1133/Ck/CHN/14            | 0.00236878        |
| 1733/Ck/USA/97             | S1133/Ck/CHN/14            | 0.00236900        |
| MS01/Ck/CHN/19             | C78/Ck/CHN/13              | 0.00634325        |
| T-98/Ck/CHN/06             | C78/Ck/CHN/13              | 0.00713973        |
| 1733/Ck/USA/97             | C78/Ck/CHN/13              | 0.00713996        |
| S1133/Ck/CHN/14            | C78/Ck/CHN/13              | 0.00791554        |
| V-ARV-SD26/Ck/CHN/20       | AHZJ19/Ck/CHN/19           | 0.01508701        |
| LY383/Ck/CHN/16            | AHZJ19/Ck/CHN/19           | 0.01587869        |
| 3211-V/Ck/HUN/02           | AHZJ19/Ck/CHN/19           | 0.02550047        |
| 3211-V/Ck/HUN/02           | V-ARV-SD26/Ck/CHN/20       | 0.02626073        |
| 3211-V/Ck/HUN/02           | LY383/Ck/CHN/16            | 0.02705241        |
| <b>R18-37308/Ck/USA/18</b> | <b>R18-38167/Ck/USA/18</b> | <b>0.02743100</b> |
| 01224A/Ck/USA/14           | PHC-2020-0545/Ck/CHN/20    | 0.02846770        |
| R18-38167/Ck/USA/18        | K1600657/Ck/USA/16         | 0.03387652        |
| R18-37308/Ck/USA/18        | K1600657/Ck/USA/16         | 0.03414080        |
| 526/Ck/CHN/13              | K1600657/Ck/USA/16         | 0.03458699        |
| 526/Ck/CHN/13              | SDYT2020/Ck/CHN/20         | 0.03541316        |
| R18-38167/Ck/USA/18        | 526/Ck/CHN/13              | 0.03755216        |
| R18-37308/Ck/USA/18        | 526/Ck/CHN/13              | 0.03781644        |
| K1600657/Ck/USA/16         | SDYT2020/Ck/CHN/20         | 0.03861343        |
| PHC-2020-0545/Ck/CHN/20    | SDYT2020/Ck/CHN/20         | 0.03948322        |
| 526/Ck/CHN/13              | PHC-2020-0545/Ck/CHN/20    | 0.04019064        |
| R18-38167/Ck/USA/18        | SDYT2020/Ck/CHN/20         | 0.04157860        |
| R18-37308/Ck/USA/18        | SDYT2020/Ck/CHN/20         | 0.04184288        |
| K1600657/Ck/USA/16         | PHC-2020-0545/Ck/CHN/20    | 0.04339091        |
| R18-38167/Ck/USA/18        | PHC-2020-0545/Ck/CHN/20    | 0.04635608        |
| R18-37308/Ck/USA/18        | PHC-2020-0545/Ck/CHN/20    | 0.04662036        |
| 01224A/Ck/USA/14           | SDYT2020/Ck/CHN/20         | 0.04697181        |
| 526/Ck/CHN/13              | 01224A/Ck/USA/14           | 0.04767923        |
| K1600657/Ck/USA/16         | 01224A/Ck/USA/14           | 0.05087950        |

The strains displaying the closest evolutionary distance to our isolates, are shown in bold red. The evolutionary distance is shown up to  $d = 0.05087950$ .

**Table S9.** Evolutionary divergence estimates between  $\mu$ A sequences of ARV isolates.

| Species 1                  | Species 2               | Dist              |
|----------------------------|-------------------------|-------------------|
| V-ARV-SD26/Ck/CHN/20       | LY383/Ck/CHN/16         | 0.00000200        |
| 1733/Ck/USA/97             | C78/Ck/CHN/13           | 0.00271224        |
| C78/Ck/CHN/13              | MS01/Ck/CHN/19          | 0.00271437        |
| 1733/Ck/USA/97             | MS01/Ck/CHN/19          | 0.00271587        |
| S1133/Ck/CHN/14            | 1733/Ck/USA/97          | 0.00407552        |
| S1133/Ck/CHN/14            | C78/Ck/CHN/13           | 0.00407603        |
| S1133/Ck/CHN/14            | MS01/Ck/CHN/19          | 0.00407965        |
| T-98/Ck/CHN/06             | MS01/Ck/CHN/19          | 0.00544851        |
| C78/Ck/CHN/13              | T-98/Ck/CHN/06          | 0.00816088        |
| 1733/Ck/USA/97             | T-98/Ck/CHN/06          | 0.00816238        |
| AHZJ19/Ck/CHN/19           | PHC-2020-0545/Ck/CHN/20 | 0.00947951        |
| S1133/Ck/CHN/14            | T-98/Ck/CHN/06          | 0.00952616        |
| 1733/Ck/USA/97             | SDYT2020/Ck/CHN/20      | 0.00955087        |
| C78/Ck/CHN/13              | SDYT2020/Ck/CHN/20      | 0.00955137        |
| MS01/Ck/CHN/19             | SDYT2020/Ck/CHN/20      | 0.00955499        |
| S1133/Ck/CHN/14            | SDYT2020/Ck/CHN/20      | 0.01091265        |
| T-98/Ck/CHN/06             | SDYT2020/Ck/CHN/20      | 0.01500150        |
| <b>R18-37308/Ck/USA/18</b> | <b>01224A/Ck/USA/14</b> | <b>0.02196731</b> |
| <b>R18-38167/Ck/USA/18</b> | <b>01224A/Ck/USA/14</b> | <b>0.02350353</b> |
| R18-38167/Ck/USA/18        | R18-37308/Ck/USA/18     | 0.02880049        |
| V-ARV-SD26/Ck/CHN/20       | 1733/Ck/USA/97          | 0.03024178        |
| LY383/Ck/CHN/16            | 1733/Ck/USA/97          | 0.03024178        |
| V-ARV-SD26/Ck/CHN/20       | C78/Ck/CHN/13           | 0.03024228        |
| LY383/Ck/CHN/16            | C78/Ck/CHN/13           | 0.03024228        |
| V-ARV-SD26/Ck/CHN/20       | MS01/Ck/CHN/19          | 0.03024590        |
| LY383/Ck/CHN/16            | MS01/Ck/CHN/19          | 0.03024590        |
| V-ARV-SD26/Ck/CHN/20       | SDYT2020/Ck/CHN/20      | 0.03046452        |
| LY383/Ck/CHN/16            | SDYT2020/Ck/CHN/20      | 0.03046452        |
| V-ARV-SD26/Ck/CHN/20       | S1133/Ck/CHN/14         | 0.03160356        |
| LY383/Ck/CHN/16            | S1133/Ck/CHN/14         | 0.03160356        |
| 526/Ck/CHN/13              | 1733/Ck/USA/97          | 0.03175511        |
| 526/Ck/CHN/13              | C78/Ck/CHN/13           | 0.03175561        |
| 526/Ck/CHN/13              | MS01/Ck/CHN/19          | 0.03175923        |
| 526/Ck/CHN/13              | SDYT2020/Ck/CHN/20      | 0.03197785        |
| V-ARV-SD26/Ck/CHN/20       | R18-38167/Ck/USA/18     | 0.03225816        |
| LY383/Ck/CHN/16            | R18-38167/Ck/USA/18     | 0.03225816        |
| V-ARV-SD26/Ck/CHN/20       | 01224A/Ck/USA/14        | 0.03310999        |
| LY383/Ck/CHN/16            | 01224A/Ck/USA/14        | 0.03310999        |

The strains displaying the closest evolutionary distance to our isolates, are shown in bold red. The evolutionary distance is shown up to  $d = 0.03310999$ .

**Table S10.** The characteristic amino acid substitutions in the M-class genomic segments.

| Strain        | Genotypic cluster | Host      | μA amino acids  |     |     |     |     |     |     |     |     |
|---------------|-------------------|-----------|-----------------|-----|-----|-----|-----|-----|-----|-----|-----|
|               |                   |           | 44              | 55  | 170 | 280 | 377 | 393 | 417 | 598 |     |
| S1133         | I                 | Chicken   | T               | T   | A   | P   | Y   | A   | K   | S   |     |
| R18-37308     | IIIa              | Chicken   | *               | I   | V   | *   | H   | T   | R   | T   |     |
| R18-38167     | IIIa              | Chicken   | P               | *   | I   | L   | H   | *   | *   | G   |     |
| 01224A        | IIIa              | Chicken   | *               | *   | V   | *   | H   | *   | *   | *   |     |
| LY383         | IIIa              | Chicken   | *               | *   | V   | *   | *   | *   | *   | N   |     |
| V-ARV-SD26    | IIIa              | Chicken   | *               | *   | V   | *   | *   | *   | *   | N   |     |
| MS01          | I                 | Chicken   | *               | *   | V   | *   | *   | *   | *   | *   |     |
| T-98          | I                 | Chicken   | *               | *   | V   | *   | *   | *   | *   | *   |     |
| C78           | I                 | Chicken   | *               | *   | V   | *   | *   | *   | *   | *   |     |
| 1733          | I                 | Chicken   | *               | *   | V   | *   | *   | *   | *   | *   |     |
| SDYT2020      | I                 | Chicken   | *               | *   | *   | *   | *   | *   | *   | *   |     |
| K1600657      | IIa               | Chicken   | *               | *   | V   | *   | *   | *   | *   | R   |     |
| 526           | IIb               | Chicken   | *               | *   | V   | *   | *   | *   | *   | *   |     |
| 3211-V        | IIc               | Chicken   | *               | *   | V   | *   | *   | *   | *   | N   |     |
| D1007         | IIc               | Partridge | *               | *   | V   | *   | *   | *   | *   | N   |     |
| PHC-2020-0545 | IIc               | Chicken   | *               | *   | V   | *   | *   | *   | *   | N   |     |
| AHZJ19        | IIc               | Chicken   | *               | *   | V   | *   | *   | *   | *   | N   |     |
| 22342         | IIb               | Turkey    | *               | *   | V   | *   | *   | *   | *   | *   |     |
| 091           | Outgroup          | Duck      | *               | *   | V   | *   | *   | S   | *   | P   |     |
| Strain        | Genotypic cluster | Host      | μB amino acids  |     |     |     |     |     |     |     |     |
|               |                   |           | 80              | 109 | 139 | 160 | 234 | 272 | 460 | 484 | 593 |
| S1133         | Ia                | Chicken   | G               | S   | N   | R   | E   | A   | S   | V   | I   |
| R18-37308     | II                | Chicken   | S               | *   | S   | K   | D   | T   | L   | T   | V   |
| 526           | II                | Chicken   | S               | *   | S   | K   | D   | T   | *   | *   | *   |
| R18-38167     | II                | Chicken   | S               | T   | S   | K   | D   | T   | *   | *   | *   |
| K1600657      | II                | Chicken   | S               | A   | S   | K   | D   | T   | *   | *   | *   |
| 01224A        | II                | Chicken   | S               | *   | S   | K   | D   | T   | *   | *   | *   |
| LY383         | II                | Chicken   | S               | *   | S   | K   | D   | T   | *   | A   | *   |
| V-ARV-SD26    | II                | Chicken   | S               | *   | S   | K   | D   | T   | *   | A   | *   |
| T-98          | I                 | Chicken   | *               | *   | *   | *   | *   | *   | *   | *   | *   |
| C78           | I                 | Chicken   | *               | *   | *   | *   | *   | *   | *   | *   | *   |
| MS01          | I                 | Chicken   | *               | *   | *   | *   | *   | *   | *   | *   | *   |
| 1733          | I                 | Chicken   | *               | *   | *   | *   | *   | *   | *   | *   | *   |
| 22342         | I                 | Turkey    | *               | *   | *   | *   | *   | *   | *   | *   | *   |
| PHC-2020-0545 | III               | Chicken   | *               | A   | *   | Q   | *   | *   | A   | *   | *   |
| SDYT2020      | III               | Chicken   | *               | A   | *   | Q   | *   | *   | A   | *   | F   |
| AHZJ19        | IV                | Chicken   | A               | *   | *   | Q   | *   | *   | *   | A   | F   |
| 3211-V        | V                 | Chicken   | *               | *   | *   | Q   | *   | *   | A   | A   | F   |
| 091           | VI                | Duck      | *               | *   | *   | Q   | *   | *   | N   | W   | L   |
| D1007         | VI                | Partridge | *               | *   | *   | Q   | *   | *   | N   | W   | L   |
| Strain        |                   | Host      | μNS amino acids |     |     |     |     |     |     |     |     |

| Genotypic cluster |     |           | 253      | 300      | 590      | 618      |
|-------------------|-----|-----------|----------|----------|----------|----------|
| S1133             | I   | Chicken   | S        | A        | V        | S        |
| R18-37308         | II  | Chicken   | A        | <b>S</b> | <b>M</b> | <b>L</b> |
| R18-38167         | II  | Chicken   | <b>T</b> | *        | <b>M</b> | <b>L</b> |
| LY383             | II  | Chicken   | A        | *        | *        | P        |
| V-ARV-SD26        | II  | Chicken   | A        | *        | *        | P        |
| 3211-V            | II  | Chicken   | A        | *        | *        | P        |
| AHZJ19            | II  | Chicken   | A        | *        | *        | P        |
| SDYT2020          | II  | Chicken   | A        | *        | *        | *        |
| D1007             | II  | Partridge | A        | *        | *        | *        |
| PHC-2020-0545     | II  | Chicken   | A        | *        | *        | P        |
| 1733              | I   | Chicken   | *        | *        | *        | *        |
| C78               | I   | Chicken   | *        | *        | *        | *        |
| T-98              | I   | Chicken   | *        | *        | *        | *        |
| MS01              | I   | Chicken   | *        | *        | *        | *        |
| K1600657          | I   | Chicken   | *        | *        | A        | *        |
| 526               | I   | Chicken   | *        | *        | A        | *        |
| 01224A            | I   | Chicken   | *        | *        | *        | *        |
| 22342             | I   | Turkey    | *        | *        | *        | *        |
| 091               | III | Duck      | P        | *        | *        | *        |

\*Our strains are denoted by red text. Unique amino acid substitutions are referred by bold red text. The highlighted asterisks refer to the amino acids identical to the reference sequence (the vaccine strain: S1133) displayed in bold.

**Table S11.** Evolutionary divergence estimates between  $\mu$ B sequences of ARV isolates.

| Species 1                   | Species 2                  | Dist              |
|-----------------------------|----------------------------|-------------------|
| V-ARV-SD26/Ck/CHN/20        | LY383/Ck/CHN/16            | 0.00138540        |
| MS01/Ck/CHN/19              | 1733/Ck/USA/97             | 0.00277034        |
| MS01/Ck/CHN/19              | S1133/Ck/CHN/14            | 0.00415563        |
| T-98/Ck/CHN/06              | MS01/Ck/CHN/19             | 0.00571019        |
| 1733/Ck/USA/97              | S1133/Ck/CHN/14            | 0.00692197        |
| C78/Ck/CHN/13               | MS01/Ck/CHN/19             | 0.00693800        |
| T-98/Ck/CHN/06              | 1733/Ck/USA/97             | 0.00847853        |
| C78/Ck/CHN/13               | 1733/Ck/USA/97             | 0.00970634        |
| PHC-2020-0545/Ck/CHN/20     | SDYT2020/Ck/CHN/20         | 0.00971786        |
| T-98/Ck/CHN/06              | S1133/Ck/CHN/14            | 0.00986382        |
| <b>R18-38167/Ck/USA/18</b>  | <b>K1600657/Ck/USA/16</b>  | <b>0.01044857</b> |
| C78/Ck/CHN/13               | S1133/Ck/CHN/14            | 0.01109163        |
| T-98/Ck/CHN/06              | C78/Ck/CHN/13              | 0.01264418        |
| 01224A/Ck/USA/14            | K1600657/Ck/USA/16         | 0.01423907        |
| 01224A/Ck/USA/14            | R18-38167/Ck/USA/18        | 0.01611146        |
| <b>V-ARV-SD26/Ck/CHN/20</b> | <b>R18-37308/Ck/USA/18</b> | <b>0.01628661</b> |
| LY383/Ck/CHN/16             | R18-37308/Ck/USA/18        | 0.01767001        |
| V-ARV-SD26/Ck/CHN/20        | 526/Ck/CHN/13              | 0.01973738        |
| LY383/Ck/CHN/16             | 526/Ck/CHN/13              | 0.02112078        |
| R18-37308/Ck/USA/18         | 526/Ck/CHN/13              | 0.02120220        |
| K1600657/Ck/USA/16          | V-ARV-SD26/Ck/CHN/20       | 0.02407793        |
| 01224A/Ck/USA/14            | V-ARV-SD26/Ck/CHN/20       | 0.02540462        |
| K1600657/Ck/USA/16          | LY383/Ck/CHN/16            | 0.02546133        |
| R18-38167/Ck/USA/18         | V-ARV-SD26/Ck/CHN/20       | 0.02595032        |
| 01224A/Ck/USA/14            | LY383/Ck/CHN/16            | 0.02678802        |
| R18-38167/Ck/USA/18         | LY383/Ck/CHN/16            | 0.02733372        |
| K1600657/Ck/USA/16          | R18-37308/Ck/USA/18        | 0.03119979        |
| 01224A/Ck/USA/14            | R18-37308/Ck/USA/18        | 0.03252648        |
| R18-38167/Ck/USA/18         | R18-37308/Ck/USA/18        | 0.03307218        |
| MS01/Ck/CHN/19              | 22342/Tk/USA/13            | 0.03395056        |
| K1600657/Ck/USA/16          | 526/Ck/CHN/13              | 0.03465056        |
| 01224A/Ck/USA/14            | 526/Ck/CHN/13              | 0.03597725        |
| T-98/Ck/CHN/06              | 22342/Tk/USA/13            | 0.03631329        |
| R18-38167/Ck/USA/18         | 526/Ck/CHN/13              | 0.03652295        |
| 1733/Ck/USA/97              | 22342/Tk/USA/13            | 0.03671890        |
| S1133/Ck/CHN/14             | 22342/Tk/USA/13            | 0.03810419        |
| C78/Ck/CHN/13               | 22342/Tk/USA/13            | 0.04088456        |

The strains displaying the closest evolutionary distance to our isolates, are shown in bold red. The evolutionary distance is shown up to  $d = 0.04088456$ .

**Table S12.** Evolutionary divergence estimates between  $\mu$ NS sequences of ARV isolates.

| Species 1                  | Species 2                  | Dist              |
|----------------------------|----------------------------|-------------------|
| T-98/Ck/CHN/06             | MS01/Ck/CHN/19             | 0.00000200        |
| S1133/Ck/CHN/14            | T-98/Ck/CHN/06             | 0.00157663        |
| S1133/Ck/CHN/14            | MS01/Ck/CHN/19             | 0.00157663        |
| 1733/Ck/USA/97             | S1133/Ck/CHN/14            | 0.00315190        |
| V-ARV-SD26/Ck/CHN/20       | LY383/Ck/CHN/16            | 0.00320242        |
| 1733/Ck/USA/97             | T-98/Ck/CHN/06             | 0.00472653        |
| 1733/Ck/USA/97             | MS01/Ck/CHN/19             | 0.00472653        |
| S1133/Ck/CHN/14            | C78/Ck/CHN/13              | 0.00472737        |
| T-98/Ck/CHN/06             | C78/Ck/CHN/13              | 0.00630000        |
| MS01/Ck/CHN/19             | C78/Ck/CHN/13              | 0.00630000        |
| 1733/Ck/USA/97             | C78/Ck/CHN/13              | 0.00787727        |
| <b>R18-37308/Ck/USA/18</b> | <b>R18-38167/Ck/USA/18</b> | <b>0.01117783</b> |
| R18-38167/Ck/USA/18        | V-ARV-SD26/Ck/CHN/20       | 0.01938768        |
| R18-37308/Ck/USA/18        | V-ARV-SD26/Ck/CHN/20       | 0.02105670        |
| R18-38167/Ck/USA/18        | LY383/Ck/CHN/16            | 0.02258809        |
| R18-37308/Ck/USA/18        | LY383/Ck/CHN/16            | 0.02425712        |
| V-ARV-SD26/Ck/CHN/20       | 3211-V/Ck/HUN/02           | 0.02456582        |
| SDYT2020/Ck/CHN/20         | AHZJ19/Ck/CHN/19           | 0.02606495        |
| LY383/Ck/CHN/16            | 3211-V/Ck/HUN/02           | 0.02776624        |
| AHZJ19/Ck/CHN/19           | V-ARV-SD26/Ck/CHN/20       | 0.03392053        |
| R18-38167/Ck/USA/18        | 3211-V/Ck/HUN/02           | 0.03442540        |
| K1600657/Ck/USA/16         | 526/Ck/CHN/13              | 0.03541044        |
| R18-37308/Ck/USA/18        | 3211-V/Ck/HUN/02           | 0.03609442        |
| SDYT2020/Ck/CHN/20         | V-ARV-SD26/Ck/CHN/20       | 0.03618584        |
| AHZJ19/Ck/CHN/19           | LY383/Ck/CHN/16            | 0.03712095        |
| SDYT2020/Ck/CHN/20         | LY383/Ck/CHN/16            | 0.03938626        |
| AHZJ19/Ck/CHN/19           | 3211-V/Ck/HUN/02           | 0.04291961        |
| AHZJ19/Ck/CHN/19           | R18-38167/Ck/USA/18        | 0.04378011        |
| S1133/Ck/CHN/14            | 526/Ck/CHN/13              | 0.04451880        |
| SDYT2020/Ck/CHN/20         | 3211-V/Ck/HUN/02           | 0.04518493        |
| AHZJ19/Ck/CHN/19           | R18-37308/Ck/USA/18        | 0.04544914        |
| SDYT2020/Ck/CHN/20         | R18-38167/Ck/USA/18        | 0.04604543        |
| T-98/Ck/CHN/06             | 526/Ck/CHN/13              | 0.04609343        |
| MS01/Ck/CHN/19             | 526/Ck/CHN/13              | 0.04609343        |
| 1733/Ck/USA/97             | 526/Ck/CHN/13              | 0.04766670        |
| SDYT2020/Ck/CHN/20         | R18-37308/Ck/USA/18        | 0.04771445        |
| C78/Ck/CHN/13              | 526/Ck/CHN/13              | 0.04924418        |
| PHC-2020-0545/Ck/CHN/20    | 3211-V/Ck/HUN/02           | 0.05001362        |

The strains displaying the closest evolutionary distance to our isolates, are shown in bold red. The evolutionary distance is shown up to  $d = 0.05001362$ .

**Table S13.** Evolutionary divergence estimates between P10 sequences of ARV isolates.

| Species 1                  | Species 2                   | Dist              |
|----------------------------|-----------------------------|-------------------|
| LY383/Ck/CHN/16            | V-ARV-SD26/Ck/CHN/20        | 0.00000000        |
| 1733/Ck/USA/97             | S1133/Ck/CHN/14             | 0.00000000        |
| C78/Ck/CHN/13              | 1733/Ck/USA/97              | 0.00000000        |
| C78/Ck/CHN/13              | S1133/Ck/CHN/14             | 0.00000000        |
| MS01/Ck/CHN/19             | C78/Ck/CHN/13               | 0.00000000        |
| MS01/Ck/CHN/19             | 1733/Ck/USA/97              | 0.00000000        |
| MS01/Ck/CHN/19             | S1133/Ck/CHN/14             | 0.00000000        |
| T-98/Ck/CHN/06             | MS01/Ck/CHN/19              | 0.00000000        |
| T-98/Ck/CHN/06             | C78/Ck/CHN/13               | 0.00000000        |
| T-98/Ck/CHN/06             | 1733/Ck/USA/97              | 0.00000000        |
| T-98/Ck/CHN/06             | S1133/Ck/CHN/14             | 0.00000000        |
| <b>R18-38167/Ck/USA/18</b> | <b>LY383/Ck/CHN/16</b>      | <b>0.01389353</b> |
| <b>R18-38167/Ck/USA/18</b> | <b>V-ARV-SD26/Ck/CHN/20</b> | <b>0.01389353</b> |
| 01224A/Ck/USA/14           | AHZJ19/Ck/CHN/19            | 0.02981907        |
| T-98/Ck/CHN/06             | 526/Ck/CHN/13               | 0.04157661        |
| MS01/Ck/CHN/19             | 526/Ck/CHN/13               | 0.04157661        |
| C78/Ck/CHN/13              | 526/Ck/CHN/13               | 0.04157661        |
| 1733/Ck/USA/97             | 526/Ck/CHN/13               | 0.04157661        |
| S1133/Ck/CHN/14            | 526/Ck/CHN/13               | 0.04157661        |
| <b>R18-37308/Ck/USA/18</b> | <b>R18-38167/Ck/USA/18</b>  | <b>0.06560132</b> |
| R18-37308/Ck/USA/18        | LY383/Ck/CHN/16             | 0.07131342        |
| R18-37308/Ck/USA/18        | V-ARV-SD26/Ck/CHN/20        | 0.07131342        |
| SDYT2020/Ck/CHN/20         | K1600657/Ck/USA/16          | 0.08304182        |
| SDYT2020/Ck/CHN/20         | 3211-V/Ck/HUN/02            | 0.14605930        |
| 22342/Tk/USA/13            | D1007/PRT/HUN/08            | 0.17585934        |
| LY383/Ck/CHN/16            | 3211-V/Ck/HUN/02            | 0.17649349        |
| V-ARV-SD26/Ck/CHN/20       | 3211-V/Ck/HUN/02            | 0.17649349        |
| LY383/Ck/CHN/16            | SDYT2020/Ck/CHN/20          | 0.17733352        |
| V-ARV-SD26/Ck/CHN/20       | SDYT2020/Ck/CHN/20          | 0.17733352        |
| 3211-V/Ck/HUN/02           | K1600657/Ck/USA/16          | 0.18983750        |
| R18-38167/Ck/USA/18        | 3211-V/Ck/HUN/02            | 0.19011943        |
| R18-38167/Ck/USA/18        | SDYT2020/Ck/CHN/20          | 0.19095946        |
| PHC-2020-0545/Ck/CHN/20    | D1007/PRT/HUN/08            | 0.19893470        |
| LY383/Ck/CHN/16            | 01224A/Ck/USA/14            | 0.21113664        |
| V-ARV-SD26/Ck/CHN/20       | 01224A/Ck/USA/14            | 0.21113664        |
| LY383/Ck/CHN/16            | K1600657/Ck/USA/16          | 0.22111173        |
| V-ARV-SD26/Ck/CHN/20       | K1600657/Ck/USA/16          | 0.22111173        |
| R18-38167/Ck/USA/18        | 01224A/Ck/USA/14            | 0.22476258        |
| LY383/Ck/CHN/16            | AHZJ19/Ck/CHN/19            | 0.22673994        |

The strains displaying the closest evolutionary distance to our isolates, are shown in bold red.  
The evolutionary distance is shown up to  $d = 0.22673994$ .

**Table 14.** The characteristic amino acid substitutions in the S-class genomic segments.

| Strain        | Genotypic cluster |     |         | Host      | S1 ORFs        |    |    |    |     |    |    |    |     |     |     |     |     |     |     |     |     |     |
|---------------|-------------------|-----|---------|-----------|----------------|----|----|----|-----|----|----|----|-----|-----|-----|-----|-----|-----|-----|-----|-----|-----|
|               | P10               | P17 | σC      |           | P10            |    |    |    | P17 |    |    |    | σC  |     |     |     |     |     |     |     |     |     |
|               |                   |     |         |           | 67             | 77 | 93 | 34 | 96  | 99 | 33 | 54 | 101 | 108 | 119 | 120 | 121 | 123 | 133 | 144 | 150 | 256 |
| S1133         | I                 | I   | I       | Chicken   | A              | V  | M  | G  | I   | L  | I  | I  | T   | S   | T   | T   | V   | G   | S   | D   | K   | T   |
| R18-37308     | V                 | V   | VI      | Chicken   | V              | A  | A  | N  | V   | D  | *  | T  | V   | R   | E   | K   | *   | A   | A   | G   | Q   | *   |
| R18-38167     | V                 | V   | VI      | Chicken   | *              | *  | A  | D  | *   | N  | V  | A  | A   | H   | K   | E   | A   | V   | T   | S   | E   | V   |
| LY383         | V                 | V   | VI      | Chicken   | *              | *  | A  | D  | *   | N  | *  | A  | A   | R   | R   | E   | *   | A   | T   | S   | Q   | I   |
| V-ARV-SD26    | V                 | V   | VI      | Chicken   | *              | *  | A  | D  | *   | N  | *  | A  | A   | R   | R   | E   | *   | A   | T   | S   | Q   | I   |
| 1733          | I                 | I   | I       | Chicken   | *              | *  | *  | *  | *   | *  | *  | *  | *   | *   | *   | *   | *   | *   | *   | *   | *   | *   |
| C78           | I                 | I   | I       | Chicken   | *              | *  | *  | *  | *   | *  | *  | *  | *   | *   | *   | *   | *   | *   | *   | *   | *   | *   |
| MS01          | I                 | I   | I       | Chicken   | *              | *  | *  | *  | *   | *  | *  | *  | *   | *   | *   | *   | *   | *   | *   | *   | *   | *   |
| T-98          | I                 | I   | I       | Chicken   | *              | *  | *  | *  | *   | *  | *  | *  | *   | *   | *   | *   | *   | *   | *   | *   | *   | *   |
| 526           | I                 | I   | I       | Chicken   | *              | *  | *  | *  | *   | *  | *  | V  | *   | *   | *   | A   | *   | R   | *   | *   | *   | *   |
| Pycno-1       | IIa               | -   | -       | Bulbul    | *              | *  | R  | -  | -   | -  | -  | -  | -   | -   | -   | -   | -   | -   | -   | -   | -   | -   |
| D1007         | IIb               | II  | II      | Partridge | *              | *  | V  | A  | *   | *  | L  | L  | S   | T   | *   | S   | *   | N   | *   | *   | *   | *   |
| 22342         | IIb               | II  | II      | Turkey    | *              | *  | V  | A  | *   | *  | *  | L  | L   | T   | *   | S   | *   | N   | *   | *   | *   | *   |
| PHC-2020-0545 | IIb               | II  | II      | Chicken   | *              | *  | I  | A  | *   | *  | *  | L  | S   | A   | P   | A   | *   | A   | G   | *   | *   | *   |
| AHZJ19        | III               | III | III     | Chicken   | *              | I  | R  | D  | *   | *  | *  | L  | S   | *   | S   | S   | *   | T   | R   | *   | A   | *   |
| 01224A        | III               | III | III     | Chicken   | *              | I  | R  | D  | *   | *  | *  | L  | S   | A   | S   | S   | *   | N   | R   | *   | A   | *   |
| 3211-V        | IV                | IV  | IV      | Chicken   | *              | I  | E  | D  | *   | S  | L  | V  | *   | D   | Q   | S   | *   | T   | *   | S   | T   | I   |
| K1600657      | IV                | -   | V       | Chicken   | *              | *  | G  | -  | -   | -  | L  | V  | S   | N   | S   | M   | *   | *   | R   | S   | S   | I   |
| SDYT2020      | IV                | IV  | V       | Chicken   | *              | *  | G  | *  | *   | V  | L  | A  | S   | N   | S   | H   | L   | *   | R   | S   | T   | I   |
| Strain        | Genotypic cluster |     |         | Host      | σA amino acids |    |    |    |     |    |    |    |     |     |     |     |     |     |     |     |     |     |
|               |                   |     |         |           | 119            |    |    |    | 225 |    |    |    | 229 |     |     |     | 315 |     |     |     | 365 |     |
| S1133         | I                 |     | Chicken | S         |                |    |    | V  |     |    |    | T  |     |     |     | P   |     |     |     | L   |     |     |

|               |                   |           |                |    |     |     |     |     |     |     |     |     |     |     |     |  |
|---------------|-------------------|-----------|----------------|----|-----|-----|-----|-----|-----|-----|-----|-----|-----|-----|-----|--|
| R18-37308     | I                 | Chicken   | P              | *  |     |     |     | N   |     |     | *   |     |     | I   |     |  |
| R18-38167     | I                 | Chicken   | *              | I  |     |     |     | *   |     |     | S   |     |     | *   |     |  |
| PHC-2020-0545 | I                 | Chicken   | *              | *  |     |     |     | *   |     |     | *   |     |     | *   |     |  |
| AHZJ19        | I                 | Chicken   | *              | *  |     |     |     | *   |     |     | *   |     |     | *   |     |  |
| 01224A        | I                 | Chicken   | *              | *  |     |     |     | *   |     |     | *   |     |     | F   |     |  |
| LY383         | I                 | Chicken   | *              | *  |     |     |     | *   |     |     | *   |     |     | *   |     |  |
| V-ARV-SD26    | I                 | Chicken   | *              | *  |     |     |     | *   |     |     | *   |     |     | *   |     |  |
| 526           | I                 | Chicken   | *              | *  |     |     |     | *   |     |     | *   |     |     | *   |     |  |
| C78           | I                 | Chicken   | *              | *  |     |     |     | *   |     |     | *   |     |     | *   |     |  |
| T-98          | I                 | Chicken   | *              | *  |     |     |     | *   |     |     | *   |     |     | *   |     |  |
| MS01          | I                 | Chicken   | *              | *  |     |     |     | *   |     |     | *   |     |     | *   |     |  |
| 1733          | I                 | Chicken   | *              | *  |     |     |     | *   |     |     | *   |     |     | *   |     |  |
| SDYT2020      | II                | Chicken   | *              | *  |     |     |     | *   |     |     | *   |     |     | *   |     |  |
| 3211-V        | II                | Chicken   | *              | *  |     |     |     | *   |     |     | *   |     |     | *   |     |  |
| D1007         | II                | Partridge | *              | *  |     |     |     | *   |     |     | *   |     |     | *   |     |  |
| 22342         | III               | Turkey    | *              | *  |     |     |     | *   |     |     | *   |     |     | *   |     |  |
| 091           | IV                | Duck      | *              | *  |     |     |     | S   |     |     | *   |     |     | *   |     |  |
| Strain        | Genotypic cluster | Host      | σB amino acids |    |     |     |     |     |     |     |     |     |     |     |     |  |
|               |                   |           | 21             | 34 | 127 | 134 | 144 | 193 | 194 | 198 | 229 | 277 | 344 | 348 | 350 |  |
| S1133         | Ia                | Chicken   | K              | T  | N   | D   | S   | S   | L   | S   | S   | H   | A   | G   | V   |  |
| R18-37308     | Ic                | Chicken   | *              | A  | *   | *   | G   | *   | *   | *   | *   | N   | *   | D   | T   |  |
| R18-38167     | Ib                | Chicken   | Q              | *  | K   | G   | *   | A   | V   | A   | A   | Q   | P   | *   | *   |  |
| K1600657      | Ib                | Chicken   | *              | *  | *   | *   | *   | *   | *   | *   | A   | Q   | *   | *   | *   |  |
| LY383         | Ib                | Chicken   | *              | *  | *   | *   | *   | *   | *   | *   | A   | Q   | *   | *   | *   |  |

| V-<br>ARV-<br>SD26    | Ib                   | Chicke<br>n   | *                       | *  | *   | *   | *   | *   | *   | * | A | Q | * | * | * |
|-----------------------|----------------------|---------------|-------------------------|----|-----|-----|-----|-----|-----|---|---|---|---|---|---|
| SDYT2<br>020          | Ib                   | Chicke<br>n   | *                       | *  | *   | *   | *   | *   | *   | * | A | Q | * | * | * |
| AHZJ1<br>9            | Ib                   | Chicke<br>n   | *                       | *  | *   | *   | *   | *   | *   | * | A | Q | * | * | * |
| PHC-<br>2020-<br>0545 | Ib                   | Chicke<br>n   | *                       | *  | *   | *   | *   | *   | *   | * | A | Q | * | * | * |
| T-98                  | Ia                   | Chicke<br>n   | *                       | *  | *   | *   | *   | *   | *   | * | * | * | * | * | * |
| 1733                  | Ia                   | Chicke<br>n   | *                       | *  | *   | *   | *   | *   | *   | * | * | * | * | * | * |
| MS01                  | Ia                   | Chicke<br>n   | *                       | *  | *   | *   | *   | *   | *   | * | * | * | * | * | * |
| C78                   | Ia                   | Chicke<br>n   | *                       | *  | *   | *   | *   | *   | *   | * | * | * | * | * | * |
| 3211-V                | Ia                   | Chicke<br>n   | *                       | *  | *   | *   | *   | *   | *   | * | * | N | * | * | * |
| 01224A                | Ia                   | Chicke<br>n   | *                       | *  | *   | *   | *   | *   | *   | * | * | * | T | * | * |
| 526                   | Ia                   | Chicke<br>n   | *                       | *  | *   | *   | *   | *   | *   | * | * | N | T | * | A |
| D1007                 | II                   | Partrid<br>ge | *                       | *  | *   | *   | *   | *   | *   | * | P | * | * | * | M |
| 22342                 | III                  | Turke<br>y    | R                       | V  | E   | *   | *   | *   | *   | H | P | * | E | R | A |
| 091                   | III                  | Duck          | R                       | I  | T   | *   | *   | M   | *   | H | P | N | T | * | S |
| Strain                | Genotypic<br>cluster | Host          | $\sigma$ NS amino acids |    |     |     |     |     |     |   |   |   |   |   |   |
|                       |                      |               | 25                      | 82 | 120 | 152 | 257 | 273 | 350 |   |   |   |   |   |   |
| S1133                 | I                    | Chick<br>en   | F                       | L  | V   | R   | M   | T   | M   |   |   |   |   |   |   |
| R18-<br>37308         | II                   | Chicke<br>n   | Y                       | *  | L   | H   | F   | V   | T   |   |   |   |   |   |   |
| R18-<br>38167         | II                   | Chicke<br>n   | Y                       | M  | I   | H   | F   | V   | T   |   |   |   |   |   |   |
| 526                   | II                   | Chicke<br>n   | *                       | *  | L   | H   | F   | V   | T   |   |   |   |   |   |   |
| 01224A                | II                   | Chicke<br>n   | *                       | *  | L   | H   | F   | V   | T   |   |   |   |   |   |   |
| LY383                 | II                   | Chicke<br>n   | *                       | *  | L   | H   | F   | V   | T   |   |   |   |   |   |   |
| V-<br>ARV-<br>SD26    | II                   | Chicke<br>n   | *                       | *  | L   | H   | F   | V   | T   |   |   |   |   |   |   |
| SDYT2<br>020          | II                   | Chicke<br>n   | *                       | *  | L   | H   | F   | V   | T   |   |   |   |   |   |   |

|                       |     |           |   |   |   |   |   |   |   |
|-----------------------|-----|-----------|---|---|---|---|---|---|---|
| K16006<br>57          | II  | Chicken   | * | * | L | H | F | V | T |
| T-98                  | I   | Chicken   | * | * | * | * | * | * | * |
| C78                   | I   | Chicken   | * | * | * | * | * | * | * |
| 1733                  | I   | Chicken   | * | * | * | * | * | * | * |
| MS01                  | I   | Chicken   | * | * | * | * | * | * | * |
| AHZJ1<br>9            | III | Chicken   | * | * | A | Q | * | * | * |
| 3211-V                | III | Chicken   | * | * | * | * | * | * | L |
| PHC-<br>2020-<br>0545 | III | Chicken   | * | * | * | * | * | * | * |
| D1007                 | IV  | Partridge | * | * | H | * | * | N | * |
| 22342                 | IV  | Turkey    | * | * | Y | * | * | S | * |
| 091                   | V   | Duck      | * | * | * | Q | * | * | * |

\*Our strains are denoted by red text. Unique amino acid substitutions are referred by bold red text. The highlighted asterisks refer to the amino acids identical to the reference sequence (the vaccine strain: S1133) displayed in bold.

**Table S15.** Evolutionary divergence estimates between P17 sequences of ARV isolates.

| Species 1                   | Species 2                  | Dist              |
|-----------------------------|----------------------------|-------------------|
| V-ARV-SD26/Ck/CHN/20        | LY383/Ck/CHN/16            | 0.00000200        |
| T-98/Ck/CHN/06              | 1733/Ck/USA/97             | 0.00000200        |
| T-98/Ck/CHN/06              | MS01/Ck/CHN/19             | 0.00000300        |
| 1733/Ck/USA/97              | MS01/Ck/CHN/19             | 0.00000300        |
| S1133/Ck/CHN/14             | MS01/Ck/CHN/19             | 0.00677441        |
| S1133/Ck/CHN/14             | T-98/Ck/CHN/06             | 0.00677541        |
| S1133/Ck/CHN/14             | 1733/Ck/USA/97             | 0.00677541        |
| C78/Ck/CHN/13               | MS01/Ck/CHN/19             | 0.00677714        |
| C78/Ck/CHN/13               | T-98/Ck/CHN/06             | 0.00677814        |
| C78/Ck/CHN/13               | 1733/Ck/USA/97             | 0.00677814        |
| C78/Ck/CHN/13               | S1133/Ck/CHN/14            | 0.01354755        |
| <b>V-ARV-SD26/Ck/CHN/20</b> | <b>R18-38167/Ck/USA/18</b> | <b>0.03802317</b> |
| <b>LY383/Ck/CHN/16</b>      | <b>R18-38167/Ck/USA/18</b> | <b>0.03802317</b> |
| <b>R18-37308/Ck/USA/18</b>  | <b>R18-38167/Ck/USA/18</b> | <b>0.05695521</b> |
| R18-37308/Ck/USA/18         | V-ARV-SD26/Ck/CHN/20       | 0.06068615        |
| R18-37308/Ck/USA/18         | LY383/Ck/CHN/16            | 0.06068615        |
| D1007/PRT/HUN/08            | 22342/Tk/USA/13            | 0.11118072        |
| 01224A/Ck/USA/14            | AHZJ19/Ck/CHN/19           | 0.11404780        |
| 526/Ck/CHN/13               | C78/Ck/CHN/13              | 0.14736841        |
| 526/Ck/CHN/13               | MS01/Ck/CHN/19             | 0.15414355        |
| 526/Ck/CHN/13               | T-98/Ck/CHN/06             | 0.15414455        |
| 526/Ck/CHN/13               | 1733/Ck/USA/97             | 0.15414455        |
| 526/Ck/CHN/13               | S1133/Ck/CHN/14            | 0.16091396        |
| SDYT2020/Ck/CHN/20          | 3211-V/Ck/HUN/02           | 0.27657625        |
| PHC-2020-0545/Ck/CHN/20     | 22342/Tk/USA/13            | 0.29041791        |
| PHC-2020-0545/Ck/CHN/20     | D1007/PRT/HUN/08           | 0.32455917        |
| R18-37308/Ck/USA/18         | 3211-V/Ck/HUN/02           | 0.40778189        |
| R18-37308/Ck/USA/18         | SDYT2020/Ck/CHN/20         | 0.40920637        |
| R18-38167/Ck/USA/18         | 3211-V/Ck/HUN/02           | 0.42163938        |
| R18-38167/Ck/USA/18         | SDYT2020/Ck/CHN/20         | 0.42306386        |
| V-ARV-SD26/Ck/CHN/20        | 3211-V/Ck/HUN/02           | 0.42537031        |
| LY383/Ck/CHN/16             | 3211-V/Ck/HUN/02           | 0.42537031        |
| V-ARV-SD26/Ck/CHN/20        | SDYT2020/Ck/CHN/20         | 0.42679479        |
| LY383/Ck/CHN/16             | SDYT2020/Ck/CHN/20         | 0.42679479        |
| 3211-V/Ck/HUN/02            | AHZJ19/Ck/CHN/19           | 0.54586437        |
| SDYT2020/Ck/CHN/20          | AHZJ19/Ck/CHN/19           | 0.54728885        |
| PHC-2020-0545/Ck/CHN/20     | AHZJ19/Ck/CHN/19           | 0.55600156        |
| R18-37308/Ck/USA/18         | AHZJ19/Ck/CHN/19           | 0.55866226        |
| R18-38167/Ck/USA/18         | AHZJ19/Ck/CHN/19           | 0.57251975        |

The strains displaying the closest evolutionary distance to our isolates, are shown in bold red.  
The evolutionary distance is shown up to  $d = 0.57251975$ .

**Table S16.** Evolutionary divergence estimates between  $\sigma$ A sequences of ARV isolates.

| Species 1                   | Species 2                  | Dist              |
|-----------------------------|----------------------------|-------------------|
| V-ARV-SD26/Ck/CHN/20        | LY383/Ck/CHN/16            | 0.00000200        |
| T-98/Ck/CHN/06              | S1133/Ck/CHN/14            | 0.00000200        |
| MS01/Ck/CHN/19              | T-98/Ck/CHN/06             | 0.00236748        |
| MS01/Ck/CHN/19              | S1133/Ck/CHN/14            | 0.00236748        |
| 1733/Ck/USA/97              | T-98/Ck/CHN/06             | 0.00237387        |
| 1733/Ck/USA/97              | S1133/Ck/CHN/14            | 0.00237387        |
| PHC-2020-0545/Ck/CHN/20     | AHZJ19/Ck/CHN/19           | 0.00237598        |
| MS01/Ck/CHN/19              | 1733/Ck/USA/97             | 0.00473534        |
| T-98/Ck/CHN/06              | C78/Ck/CHN/13              | 0.00714298        |
| S1133/Ck/CHN/14             | C78/Ck/CHN/13              | 0.00714298        |
| <b>V-ARV-SD26/Ck/CHN/20</b> | <b>R18-38167/Ck/USA/18</b> | <b>0.00947308</b> |
| <b>LY383/Ck/CHN/16</b>      | <b>R18-38167/Ck/USA/18</b> | <b>0.00947308</b> |
| MS01/Ck/CHN/19              | C78/Ck/CHN/13              | 0.00950645        |
| 1733/Ck/USA/97              | C78/Ck/CHN/13              | 0.00951285        |
| 3211-V/Ck/HUN/02            | SDYT2020/Ck/CHN/20         | 0.01207259        |
| AHZJ19/Ck/CHN/19            | R18-38167/Ck/USA/18        | 0.01425852        |
| <b>R18-37308/Ck/USA/18</b>  | <b>R18-38167/Ck/USA/18</b> | <b>0.01425894</b> |
| AHZJ19/Ck/CHN/19            | V-ARV-SD26/Ck/CHN/20       | 0.01426347        |
| AHZJ19/Ck/CHN/19            | LY383/Ck/CHN/16            | 0.01426347        |
| R18-37308/Ck/USA/18         | V-ARV-SD26/Ck/CHN/20       | 0.01426389        |
| R18-37308/Ck/USA/18         | LY383/Ck/CHN/16            | 0.01426389        |
| T-98/Ck/CHN/06              | R18-38167/Ck/USA/18        | 0.01427675        |
| S1133/Ck/CHN/14             | R18-38167/Ck/USA/18        | 0.01427675        |
| V-ARV-SD26/Ck/CHN/20        | T-98/Ck/CHN/06             | 0.01428370        |
| LY383/Ck/CHN/16             | T-98/Ck/CHN/06             | 0.01428370        |
| V-ARV-SD26/Ck/CHN/20        | S1133/Ck/CHN/14            | 0.01428370        |
| LY383/Ck/CHN/16             | S1133/Ck/CHN/14            | 0.01428370        |
| R18-37308/Ck/USA/18         | AHZJ19/Ck/CHN/19           | 0.01431613        |
| PHC-2020-0545/Ck/CHN/20     | R18-38167/Ck/USA/18        | 0.01663250        |
| PHC-2020-0545/Ck/CHN/20     | V-ARV-SD26/Ck/CHN/20       | 0.01663745        |
| PHC-2020-0545/Ck/CHN/20     | LY383/Ck/CHN/16            | 0.01663745        |
| MS01/Ck/CHN/19              | R18-38167/Ck/USA/18        | 0.01664023        |
| 1733/Ck/USA/97              | R18-38167/Ck/USA/18        | 0.01664662        |
| V-ARV-SD26/Ck/CHN/20        | MS01/Ck/CHN/19             | 0.01664718        |
| LY383/Ck/CHN/16             | MS01/Ck/CHN/19             | 0.01664718        |
| V-ARV-SD26/Ck/CHN/20        | 1733/Ck/USA/97             | 0.01665357        |
| LY383/Ck/CHN/16             | 1733/Ck/USA/97             | 0.01665357        |
| R18-37308/Ck/USA/18         | PHC-2020-0545/Ck/CHN/20    | 0.01669011        |
| AHZJ19/Ck/CHN/19            | T-98/Ck/CHN/06             | 0.01906914        |

The strains displaying the closest evolutionary distance to our isolates, are shown in bold red.  
The evolutionary distance is shown up to  $d = 0.01906914$ .

**Table S17.** Evolutionary divergence estimates between  $\sigma$ B sequences of ARV isolates.

| Species 1               | Species 2               | Dist       |
|-------------------------|-------------------------|------------|
| LY383/Ck/CHN/16         | V-ARV-SD26/Ck/CHN/20    | 0.00007188 |
| T-98/Ck/CHN/06          | 1733/Ck/USA/97          | 0.00010782 |
| S1133/Ck/CHN/14         | 1733/Ck/USA/97          | 0.00275062 |
| T-98/Ck/CHN/06          | S1133/Ck/CHN/14         | 0.00278656 |
| K1600657/Ck/USA/16      | V-ARV-SD26/Ck/CHN/20    | 0.00285444 |
| LY383/Ck/CHN/16         | K1600657/Ck/USA/16      | 0.00285444 |
| LY383/Ck/CHN/16         | SDYT2020/Ck/CHN/20      | 0.00557383 |
| SDYT2020/Ck/CHN/20      | V-ARV-SD26/Ck/CHN/20    | 0.00557383 |
| SDYT2020/Ck/CHN/20      | K1600657/Ck/USA/16      | 0.00828450 |
| LY383/Ck/CHN/16         | PHC-2020-0545/Ck/CHN/20 | 0.00828925 |
| PHC-2020-0545/Ck/CHN/20 | V-ARV-SD26/Ck/CHN/20    | 0.00828925 |
| LY383/Ck/CHN/16         | AHZJ19/Ck/CHN/19        | 0.00832138 |
| AHZJ19/Ck/CHN/19        | V-ARV-SD26/Ck/CHN/20    | 0.00832138 |
| T-98/Ck/CHN/06          | MS01/Ck/CHN/19          | 0.01089808 |
| 1733/Ck/USA/97          | MS01/Ck/CHN/19          | 0.01093402 |
| AHZJ19/Ck/CHN/19        | K1600657/Ck/USA/16      | 0.01096017 |
| MS01/Ck/CHN/19          | C78/Ck/CHN/13           | 0.01097022 |
| PHC-2020-0545/Ck/CHN/20 | K1600657/Ck/USA/16      | 0.01099992 |
| S1133/Ck/CHN/14         | MS01/Ck/CHN/19          | 0.01361276 |
| PHC-2020-0545/Ck/CHN/20 | SDYT2020/Ck/CHN/20      | 0.01364743 |
| AHZJ19/Ck/CHN/19        | SDYT2020/Ck/CHN/20      | 0.01375145 |
| AHZJ19/Ck/CHN/19        | PHC-2020-0545/Ck/CHN/20 | 0.01646686 |
| T-98/Ck/CHN/06          | C78/Ck/CHN/13           | 0.01650219 |
| 1733/Ck/USA/97          | C78/Ck/CHN/13           | 0.01653813 |
| S1133/Ck/CHN/14         | C78/Ck/CHN/13           | 0.01921687 |
| T-98/Ck/CHN/06          | 3211-V/Ck/HUN/02        | 0.02238411 |
| 1733/Ck/USA/97          | 3211-V/Ck/HUN/02        | 0.02242005 |
| S1133/Ck/CHN/14         | 3211-V/Ck/HUN/02        | 0.02509880 |
| 01224A/Ck/USA/14        | 526/Ck/CHN/13           | 0.02755056 |
| MS01/Ck/CHN/19          | 3211-V/Ck/HUN/02        | 0.02777997 |
| C78/Ck/CHN/13           | 3211-V/Ck/HUN/02        | 0.03338408 |
| T-98/Ck/CHN/06          | 01224A/Ck/USA/14        | 0.04123902 |
| 1733/Ck/USA/97          | 01224A/Ck/USA/14        | 0.04127496 |
| 3211-V/Ck/HUN/02        | 01224A/Ck/USA/14        | 0.04150623 |
| S1133/Ck/CHN/14         | 01224A/Ck/USA/14        | 0.04395370 |
| MS01/Ck/CHN/19          | 01224A/Ck/USA/14        | 0.04663487 |
| T-98/Ck/CHN/06          | 526/Ck/CHN/13           | 0.04671569 |
| 1733/Ck/USA/97          | 526/Ck/CHN/13           | 0.04675163 |
| 3211-V/Ck/HUN/02        | 526/Ck/CHN/13           | 0.04698290 |
| T-98/Ck/CHN/06          | K1600657/Ck/USA/16      | 0.04782568 |

|                            |                           |                   |
|----------------------------|---------------------------|-------------------|
| 1733/Ck/USA/97             | K1600657/Ck/USA/16        | 0.04786162        |
| 3211-V/Ck/HUN/02           | K1600657/Ck/USA/16        | 0.04809289        |
| S1133/Ck/CHN/14            | 526/Ck/CHN/13             | 0.04943037        |
| S1133/Ck/CHN/14            | K1600657/Ck/USA/16        | 0.05054036        |
| T-98/Ck/CHN/06             | LY383/Ck/CHN/16           | 0.05060824        |
| T-98/Ck/CHN/06             | V-ARV-SD26/Ck/CHN/20      | 0.05060824        |
| 1733/Ck/USA/97             | LY383/Ck/CHN/16           | 0.05064418        |
| 1733/Ck/USA/97             | V-ARV-SD26/Ck/CHN/20      | 0.05064418        |
| 3211-V/Ck/HUN/02           | LY383/Ck/CHN/16           | 0.05087545        |
| 3211-V/Ck/HUN/02           | V-ARV-SD26/Ck/CHN/20      | 0.05087545        |
| MS01/Ck/CHN/19             | 526/Ck/CHN/13             | 0.05211154        |
| C78/Ck/CHN/13              | 01224A/Ck/USA/14          | 0.05223899        |
| MS01/Ck/CHN/19             | K1600657/Ck/USA/16        | 0.05322154        |
| S1133/Ck/CHN/14            | LY383/Ck/CHN/16           | 0.05332292        |
| S1133/Ck/CHN/14            | V-ARV-SD26/Ck/CHN/20      | 0.05332292        |
| <b>R18-38167/Ck/USA/18</b> | <b>K1600657/Ck/USA/16</b> | <b>0.05404628</b> |
| MS01/Ck/CHN/19             | LY383/Ck/CHN/16           | 0.05600409        |
| MS01/Ck/CHN/19             | V-ARV-SD26/Ck/CHN/20      | 0.05600409        |
| T-98/Ck/CHN/06             | SDYT2020/Ck/CHN/20        | 0.05603830        |
| 1733/Ck/USA/97             | SDYT2020/Ck/CHN/20        | 0.05607424        |
| 3211-V/Ck/HUN/02           | SDYT2020/Ck/CHN/20        | 0.05630551        |
| R18-38167/Ck/USA/18        | LY383/Ck/CHN/16           | 0.05682884        |
| R18-38167/Ck/USA/18        | V-ARV-SD26/Ck/CHN/20      | 0.05682884        |
| C78/Ck/CHN/13              | 526/Ck/CHN/13             | 0.05771566        |
| T-98/Ck/CHN/06             | AHZJ19/Ck/CHN/19          | 0.05871397        |
| 1733/Ck/USA/97             | AHZJ19/Ck/CHN/19          | 0.05874991        |
| S1133/Ck/CHN/14            | SDYT2020/Ck/CHN/20        | 0.05875298        |
| T-98/Ck/CHN/06             | PHC-2020-0545/Ck/CHN/20   | 0.05875372        |
| 1733/Ck/USA/97             | PHC-2020-0545/Ck/CHN/20   | 0.05878966        |
| C78/Ck/CHN/13              | K1600657/Ck/USA/16        | 0.05882565        |
| 3211-V/Ck/HUN/02           | AHZJ19/Ck/CHN/19          | 0.05898118        |
| 3211-V/Ck/HUN/02           | PHC-2020-0545/Ck/CHN/20   | 0.05902093        |
| 01224A/Ck/USA/14           | K1600657/Ck/USA/16        | 0.06009969        |
| <b>R18-37308/Ck/USA/18</b> | <b>T-98/Ck/CHN/06</b>     | <b>0.06027485</b> |
| R18-37308/Ck/USA/18        | 1733/Ck/USA/97            | 0.06031079        |
| R18-37308/Ck/USA/18        | 3211-V/Ck/HUN/02          | 0.06054206        |
| S1133/Ck/CHN/14            | AHZJ19/Ck/CHN/19          | 0.06142866        |
| MS01/Ck/CHN/19             | SDYT2020/Ck/CHN/20        | 0.06143416        |
| S1133/Ck/CHN/14            | PHC-2020-0545/Ck/CHN/20   | 0.06146840        |

The strains displaying the closest evolutionary distance to our isolates, are shown in bold red. The evolutionary distance is shown up to  $d = 0.06146840$ .

**Table S18.** Evolutionary divergence estimates between  $\sigma$ NS sequences of ARV isolates.

| Species 1                  | Species 2                  | Dist              |
|----------------------------|----------------------------|-------------------|
| 1733/Ck/USA/97             | S1133/Ck/CHN/14            | 0.00014649        |
| T-98/Ck/CHN/06             | 1733/Ck/USA/97             | 0.00278027        |
| C78/Ck/CHN/13              | S1133/Ck/CHN/14            | 0.00281473        |
| 1733/Ck/USA/97             | MS01/Ck/CHN/19             | 0.00282241        |
| MS01/Ck/CHN/19             | S1133/Ck/CHN/14            | 0.00282241        |
| T-98/Ck/CHN/06             | S1133/Ck/CHN/14            | 0.00285351        |
| C78/Ck/CHN/13              | 1733/Ck/USA/97             | 0.00288797        |
| T-98/Ck/CHN/06             | MS01/Ck/CHN/19             | 0.00552944        |
| C78/Ck/CHN/13              | MS01/Ck/CHN/19             | 0.00556390        |
| T-98/Ck/CHN/06             | C78/Ck/CHN/13              | 0.00559500        |
| LY383/Ck/CHN/16            | V-ARV-SD26/Ck/CHN/20       | 0.00827214        |
| LY383/Ck/CHN/16            | SDYT2020/Ck/CHN/20         | 0.00846286        |
| <b>R18-37308/Ck/USA/18</b> | <b>LY383/Ck/CHN/16</b>     | <b>0.01115762</b> |
| R18-37308/Ck/USA/18        | SDYT2020/Ck/CHN/20         | 0.01375624        |
| <b>R18-37308/Ck/USA/18</b> | <b>R18-38167/Ck/USA/18</b> | <b>0.01377159</b> |
| R18-38167/Ck/USA/18        | LY383/Ck/CHN/16            | 0.01400592        |
| 01224A/Ck/USA/14           | LY383/Ck/CHN/16            | 0.01401051        |
| 526/Ck/CHN/13              | LY383/Ck/CHN/16            | 0.01493020        |
| 01224A/Ck/USA/14           | SDYT2020/Ck/CHN/20         | 0.01653588        |
| R18-38167/Ck/USA/18        | SDYT2020/Ck/CHN/20         | 0.01660454        |
| V-ARV-SD26/Ck/CHN/20       | SDYT2020/Ck/CHN/20         | 0.01666176        |
| R18-37308/Ck/USA/18        | 01224A/Ck/USA/14           | 0.01930388        |
| R18-37308/Ck/USA/18        | V-ARV-SD26/Ck/CHN/20       | 0.01935651        |
| 526/Ck/CHN/13              | SDYT2020/Ck/CHN/20         | 0.02074305        |
| R18-38167/Ck/USA/18        | 01224A/Ck/USA/14           | 0.02215219        |
| R18-38167/Ck/USA/18        | V-ARV-SD26/Ck/CHN/20       | 0.02220482        |
| 01224A/Ck/USA/14           | V-ARV-SD26/Ck/CHN/20       | 0.02220940        |
| 526/Ck/CHN/13              | V-ARV-SD26/Ck/CHN/20       | 0.02312910        |
| R18-37308/Ck/USA/18        | 526/Ck/CHN/13              | 0.02343780        |
| R18-38167/Ck/USA/18        | 526/Ck/CHN/13              | 0.02628611        |
| 526/Ck/CHN/13              | 01224A/Ck/USA/14           | 0.02629069        |
| 3211-V/Ck/HUN/02           | PHC-2020-0545/Ck/CHN/20    | 0.03423009        |
| SDYT2020/Ck/CHN/20         | K1600657/Ck/USA/16         | 0.04214728        |
| LY383/Ck/CHN/16            | K1600657/Ck/USA/16         | 0.04514999        |
| PHC-2020-0545/Ck/CHN/20    | ARV/AHZJ19/CHN/19          | 0.04682323        |
| R18-37308/Ck/USA/18        | K1600657/Ck/USA/16         | 0.05044336        |
| 22342/Tk/USA/13            | D1007/PRT/HUN/08           | 0.05248436        |
| 01224A/Ck/USA/14           | K1600657/Ck/USA/16         | 0.05322300        |
| 3211-V/Ck/HUN/02           | ARV/AHZJ19/CHN/19          | 0.05323007        |

The strains displaying the closest evolutionary distance to our isolates, are shown in bold red.  
The evolutionary distance is shown up to  $d = 0.05323007$ .

**Table S19.** Accession numbers of sequences used for phylogenetic analysis of ARV coding sequences for genotypic clustering.

| Accession No. |          |          |          |          |          |          |          |          |          | Isolate                | Year | Country | Abbreviated name*       |
|---------------|----------|----------|----------|----------|----------|----------|----------|----------|----------|------------------------|------|---------|-------------------------|
| L1            | L2       | L3       | M1       | M2       | M3       | S1       | S2       | S3       | S4       |                        |      |         |                         |
| OK077993      | OK077994 | OK077995 | OK077996 | OK077997 | OK077998 | OK077999 | OK078002 | OK078003 | OK078004 | AHZJ19                 | 2019 | China   | AHZJ19/Ck/CHN/19        |
| MF183221      | MF183212 | MF183213 | MF183214 | MF183215 | MF183216 | MF183217 | MF183218 | MF183219 | MF183220 | LY383                  | 2016 | China   | LY383/Ck/CHN/16         |
| KY860642      | KY860641 | KY860640 | KY860639 | KY860638 | KY860637 | KY860636 | KY860635 | KY860634 | KY860633 | MS01                   | 2017 | China   | MS01/Ck/CHN/19          |
| MK583331      | MK583332 | MK583333 | MK583334 | MK583335 | MK583336 | MK583337 | MK583338 | MK583339 | MK583340 | K1600657               | 2016 | USA     | K1600657/Ck/USA/16      |
| KF741696      | KF741697 | KF741698 | KF741699 | KF741700 | KF741701 | KF741702 | KF741703 | KF741704 | KF741705 | 526                    | 2013 | China   | 526/Ck/CHN/13           |
| KF741706      | KF741707 | KF741708 | KF741709 | KF741710 | KF741711 | KF741712 | KF741713 | KF741714 | KF741715 | 1733                   | 1997 | USA     | 1733/Ck/USA/97          |
| KX398272      | KX398273 | KX398274 | KX398275 | KX398276 | KX398277 | KX398278 | KX398279 | KX398280 | KX398281 | 3211-V-02              | 2002 | Hungary | 3211-V/Ck/HUN/02        |
| KF741716      | KF741717 | KF741718 | KF741719 | KF741720 | KF741721 | KF741722 | KF741723 | KF741724 | KF741725 | C78                    | 2013 | China   | C78/Ck/CHN/13           |
| MW174784      | MW174785 | MW174786 | MW174787 | MW174788 | MW174789 | MW174790 | MW174791 | MW174792 | MW174793 | PHC-2020-0545          | 2020 | China   | PHC-2020-0545/Ck/CHN/20 |
| KT428298      | KT428299 | KT428300 | KT428301 | KT428302 | KT428303 | KT428304 | KT428305 | KT428306 | KT428307 | Reo/PA/Layer/01224A/14 | 2014 | USA     | 01224A/Ck/USA/14        |
| KF741756      | KF741757 | KF741758 | KF741759 | KF741760 | KF741761 | KF741762 | KF741763 | KF741764 | KF741765 | S1133                  | 2014 | China   | S1133/Ck/CHN/14         |
| MW394456      | MW394457 | MW394458 | MW394459 | MW394460 | MW394461 | MW394462 | MW394463 | MW394464 | MW394465 | SDYT2020               | 2020 | China   | SDYT2020/Ck/CHN/20      |
| EU616739      | JN641889 | EU616738 | EU616736 | EU616742 | EU616743 | EF057398 | JN641887 | EF030499 | JN641884 | T-98                   | 2006 | China   | T-98/Ck/CHN/06          |
| MW244842      | MW244843 | MW244844 | MW244845 | MW244846 | MW244847 | MW244848 | MW244849 | MW244850 | MW244851 | V-ARV-SD26             | 2020 | China   | V-ARV-SD26/Ck/CHN/20    |
| KP173683      | KP173684 | KP173685 | KP173686 | KP173687 | KP173688 | KP173689 | KP173690 | KP173691 | KP173692 | Reo/PA/Turkey/22342/13 | 2013 | USA     | 22342/Tk/USA/13         |

|          |          |          |          |          |          |          |          |          |          |         |      |             |                        |
|----------|----------|----------|----------|----------|----------|----------|----------|----------|----------|---------|------|-------------|------------------------|
| KR476798 | KR476800 | KR476799 | KR476801 | KR476802 | KR476803 | KR476804 | KR476805 | KR476806 | KR476807 | D1007   | 2008 | Hungar<br>y | D1007/PRT/<br>HUN/08   |
| JX478250 | JX478251 | JX478252 | JX478253 | JX478254 | JX478255 | JX478256 | JX478257 | JX478258 | JX478259 | 091     | 2009 | China       | 091/Dk/CHN<br>/09      |
| AB914760 | AB914761 | AB914762 | AB914763 | AB914764 | AB914765 | AB914766 | AB914767 | AB914768 | AB914769 | Pycno-1 | 2014 | Japan       | Pycno-<br>1/Bul/JAP/14 |

---

\*Abbreviated name followed the order of Isolate\_name/Host/ Country\_of\_origin/Collection\_year.

**Table S20.** Accession numbers of sequences used for whole genome alignment.

| Accession No. |           |           |           |           |           |           |           |           |           | Isolate                        | Year | Genogr<br>oup<br>(Acc. To<br>Sigma<br>C) | Countr<br>y | Abbreviate<br>d name             |
|---------------|-----------|-----------|-----------|-----------|-----------|-----------|-----------|-----------|-----------|--------------------------------|------|------------------------------------------|-------------|----------------------------------|
| L1            | L2        | L3        | M1        | M2        | M3        | S1        | S2        | S3        | S4        |                                |      |                                          |             |                                  |
| KF741756      | KF741757  | KF741758  | KF741759  | KF741760  | KF741761  | KF741762  | KF741763  | KF741764  | KF741765  | S1133                          | 2014 | I                                        | China       | ARV/S1133/C<br>HN/14             |
| KF741706      | KF741707  | KF741708  | KF741709  | KF741710  | KF741711  | KF741712  | KF741713  | KF741714  | KF741715  | 1733                           | 1997 | I                                        | USA         | ARV/1733/U<br>SA/97              |
| KR476798      | KR476799  | KR476800  | KR476801  | KR476802  | KR476803  | KR476804  | KR476805  | KR476806  | KR476807  | D1007                          | 2008 | II                                       | Hungar<br>y | D1007/PRT/<br>HUN/08             |
| MW174784      | MW174785  | MW174786  | MW174787  | MW174788  | MW174789  | MW174790  | MW174791  | MW174792  | MW174793  | PHC-2020-<br>0545              | 2020 | II                                       | China       | ARV/PHC-<br>2020-<br>0545/CHN/20 |
| KP173683      | KP173684  | KP173685  | KP173686  | KP173687  | KP173688  | KP173689  | KP173690  | KP173691  | KP173692  | Reo/PA/T<br>urkey/<br>22342/13 | 2013 | II                                       | USA         | TARV/22342/<br>USA/13            |
| KT428298      | KT428299  | KT428300  | KT428301  | KT428302  | KT428303  | KT428304  | KT428305  | KT428306  | KT428307  | Reo/PA/L<br>ayer/01224<br>A/14 | 2014 | III                                      | USA         | ARV/01224A/<br>USA/14            |
| KX398272      | KX398273  | KX398274  | KX398275  | KX398276  | KX398277  | KX398278  | KX398279  | KX398280  | KX398281  | 3211-V-02                      | 2002 | IV                                       | Hungar<br>y | ARV/3211-V-<br>02/HUN/02         |
| NC_015126     | NC_015127 | NC_015128 | NC_015129 | NC_015130 | NC_015131 | NC_015132 | NC_015133 | NC_015134 | NC_015135 | AVS-B                          | 2006 | V                                        | USA         | AVS-<br>B/Ck/USA/06              |
| MF183221      | MF183212  | MF183213  | MF183214  | MF183215  | MF183216  | MF183217  | MF183218  | MF183219  | MF183220  | LY383                          | 2016 | VI                                       | China       | ARV/LY383/<br>CHN/16             |
| AB914760      | AB914761  | AB914762  | AB914763  | AB914764  | AB914765  | AB914766  | AB914767  | AB914768  | AB914769  | Pycno-1                        | 2014 | Outgrou<br>p                             | Japan       | Pycno-<br>1/Bul/JAP/14           |

\*Abbreviated name followed the order of Isolate\_name/Host/ Country\_of\_origin/Collection\_year
